# Supplementary material
Source: PubMed Central journal article supplement (PMC7676477)
Supplement: NIHMS1643179-supplement-1.pdf [file NIHMS1643179-supplement-1.pdf]

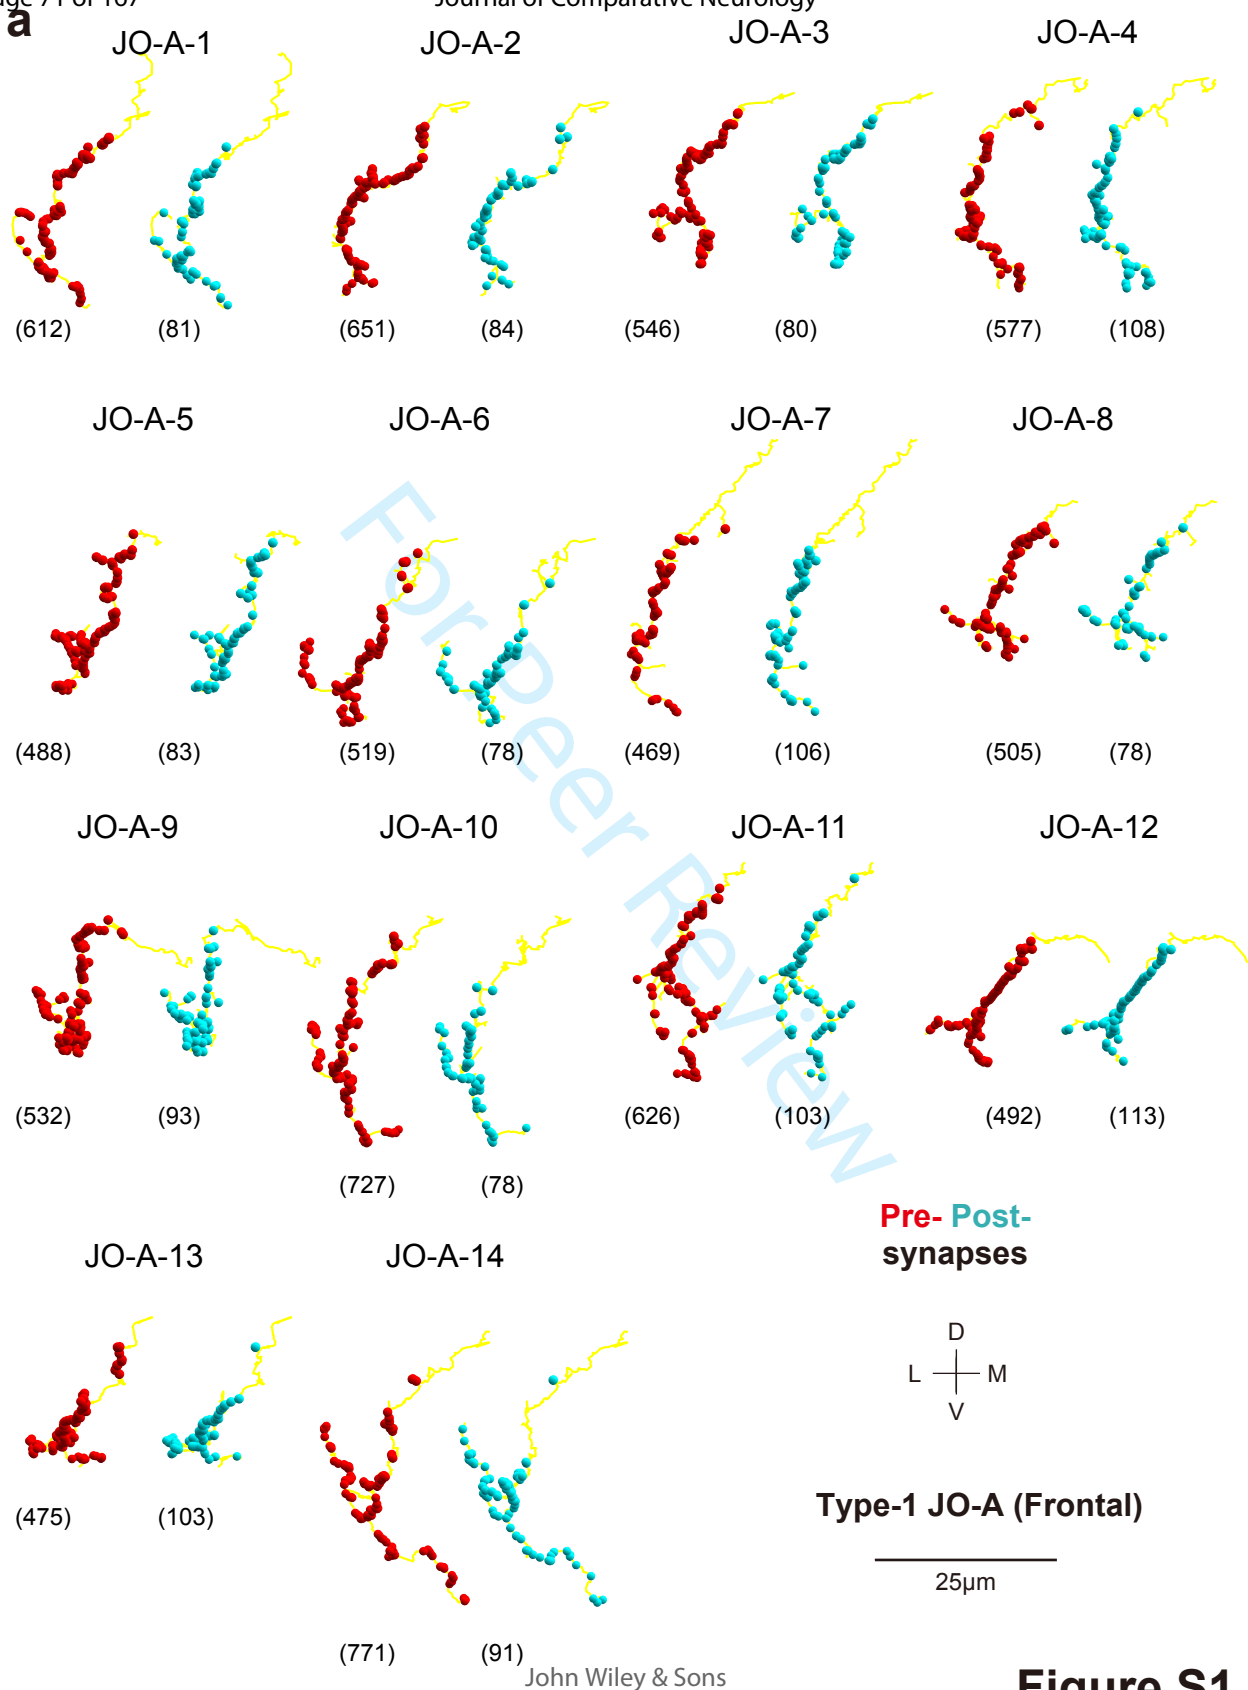

**b**

JO-A-1

JO-A-2

JO-A-3

JO-A-4

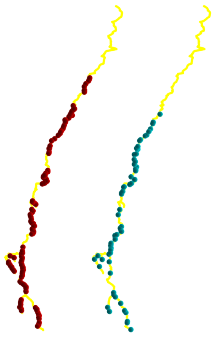

(612) (81)

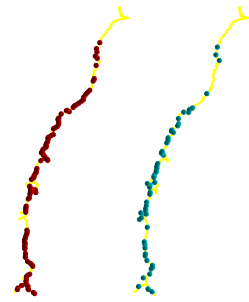

(651) (84)

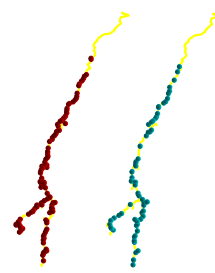

(546) (80)

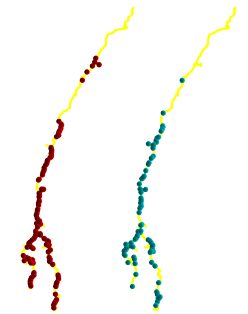

(577) (108)

JO-A-5

JO-A-6

JO-A-7

JO-A-8

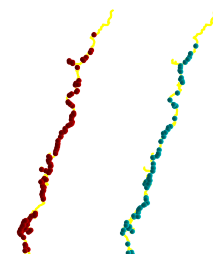

(488) (83)

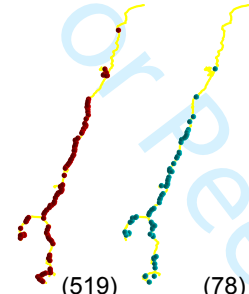

(519) (78)

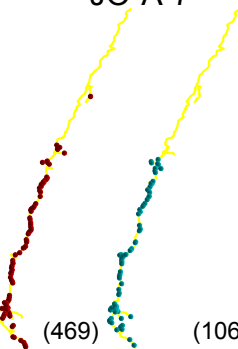

(469) (106)

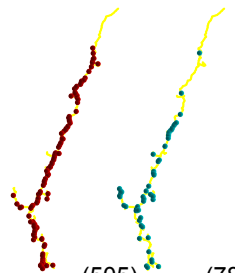

(505) (78)

JO-A-9

JO-A-10

JO-A-11

JO-A-12

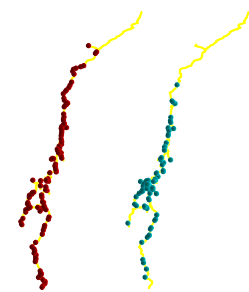

(532) (93)

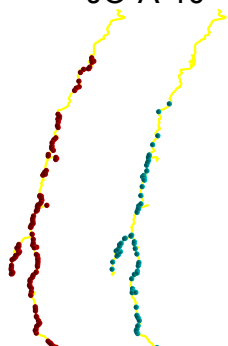

(727) (78)

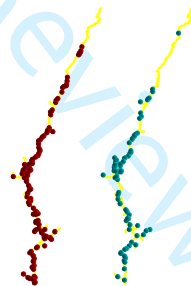

(626) (103)

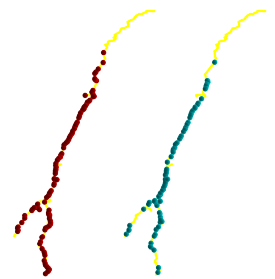

(492) (113)

JO-A-13

JO-A-14

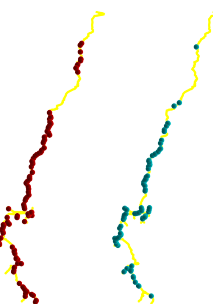

(475) (103)

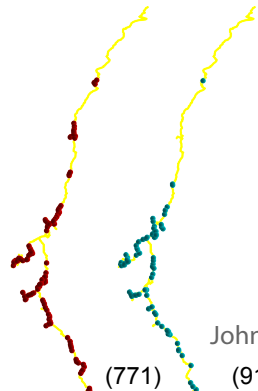

(771) (91)

**Pre- Post-  
synapses**
**Type-1 JO-A (Horizontal)**

50µm



**C**

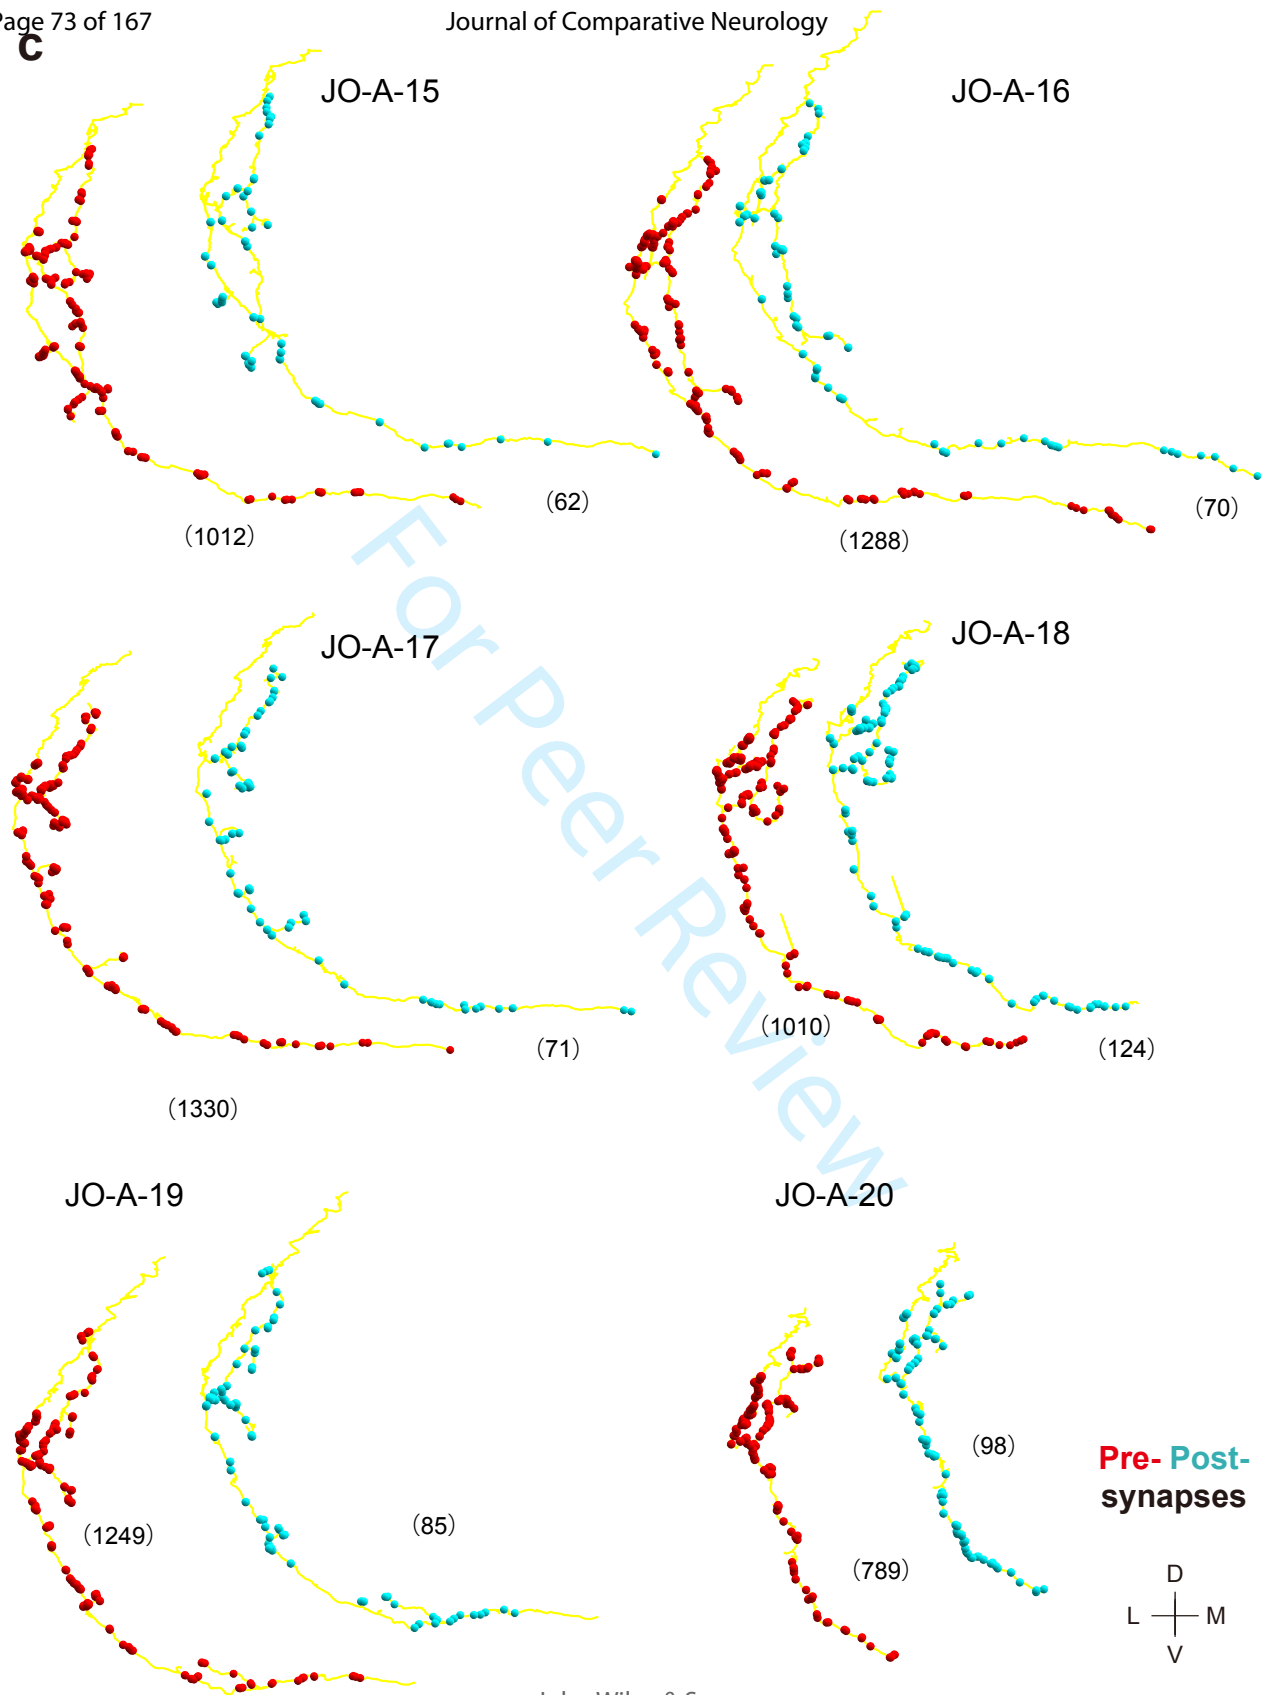

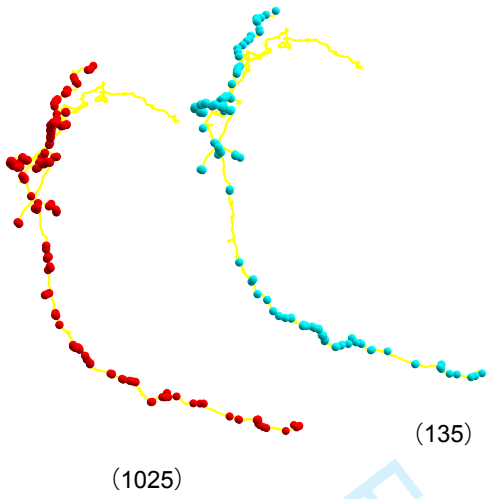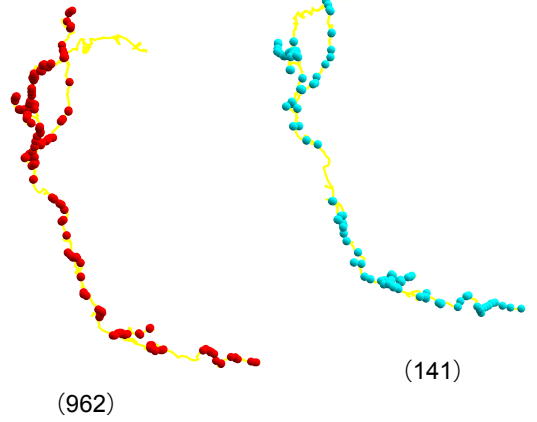

JO-A-23

JO-A-24

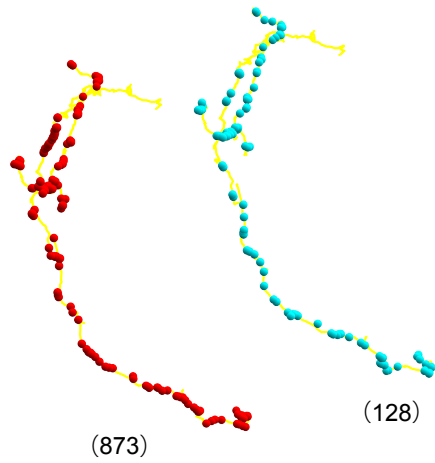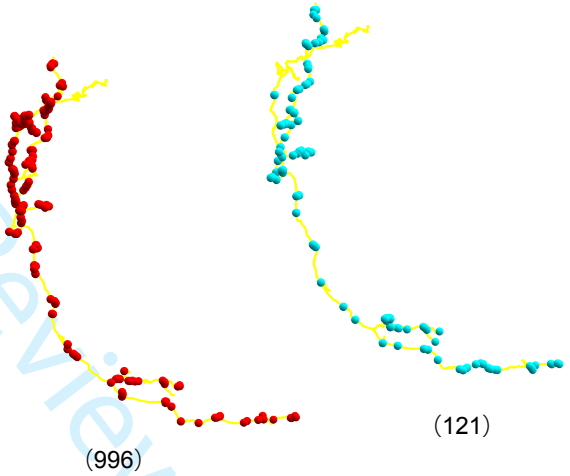

Pre- Post-  
synapses

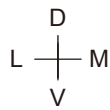

JO-A-25

JO-A-26

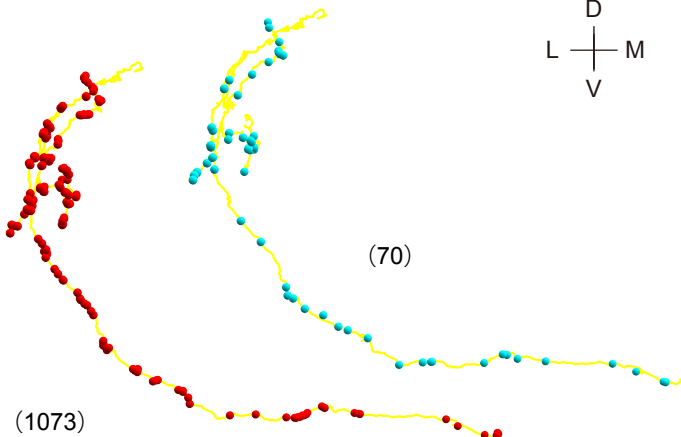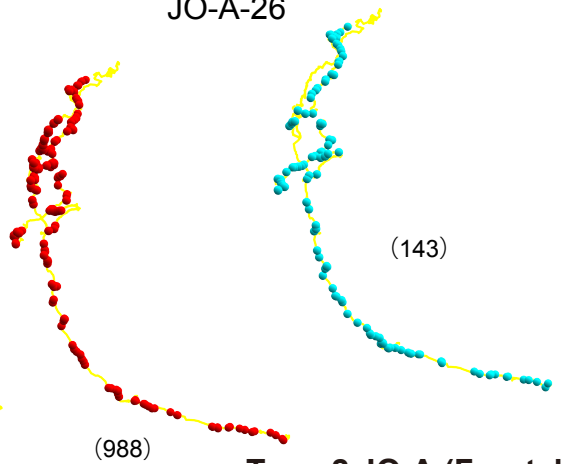

JO-A-27

JO-A-28

Pre- Post-  
synapses

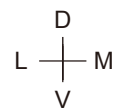

25µm

Type-2 JO-A (Frontal)

(977)

(132)

(1111)

(70)

JO-A-29

JO-A-30

(62)

(1217)

(1124)

(94)

JO-A-31

JO-A-32

(95)

(1225)

John Wiley & Sons

(842)

(77)

For Peer Review

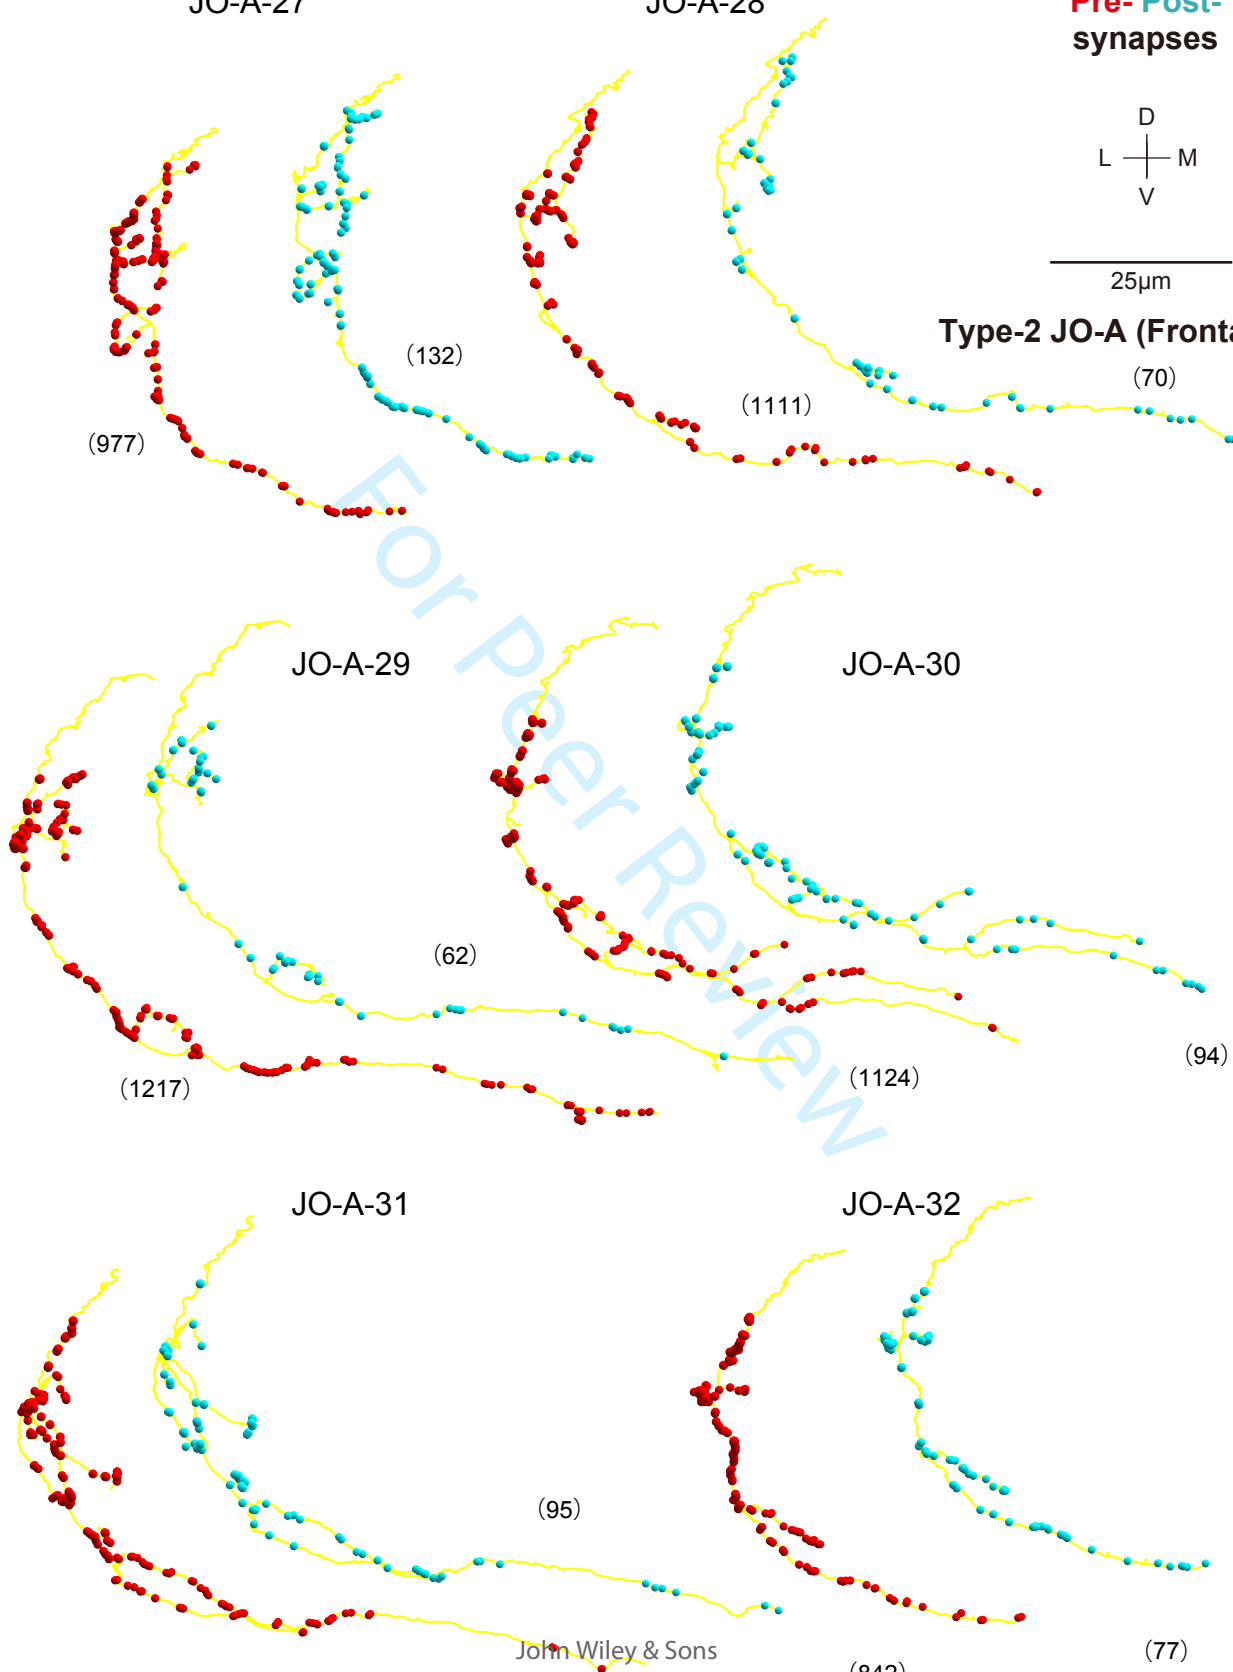

JO-A-33

JO-A-34

Pre- Post-  
synapses

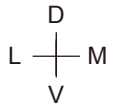

Type-2 JO-A (Frontal)

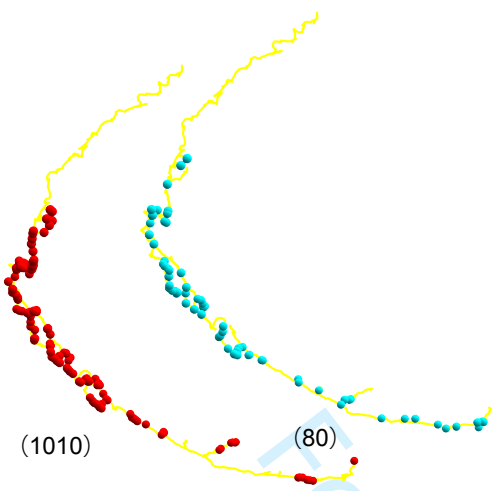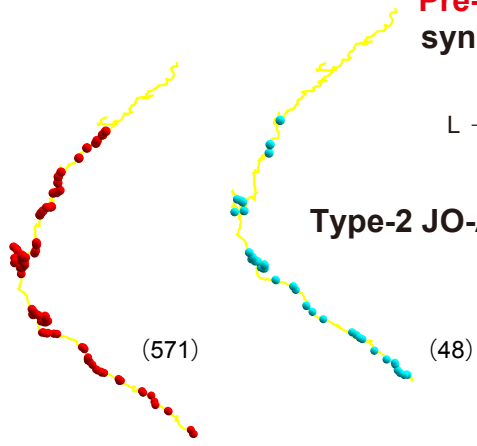

JO-A-35

JO-A-36

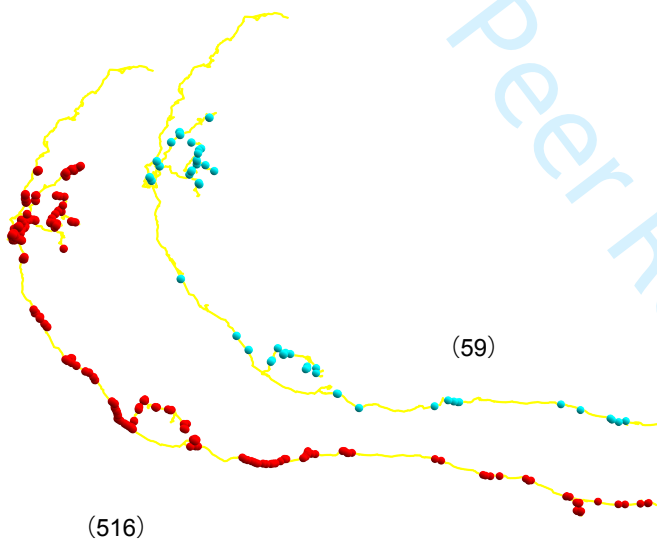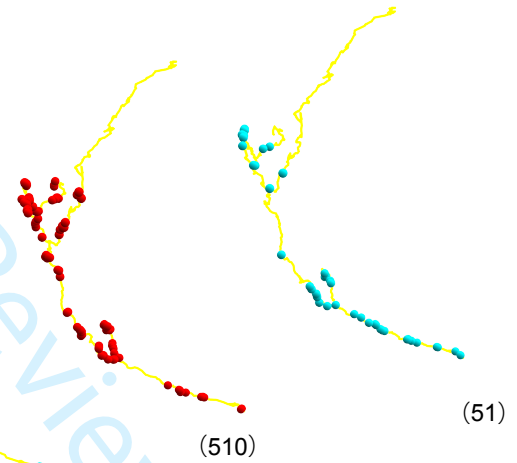

JO-A-37

JO-A-38

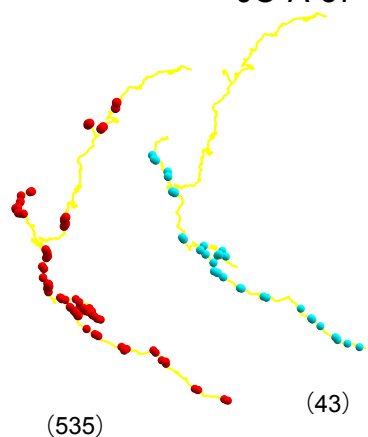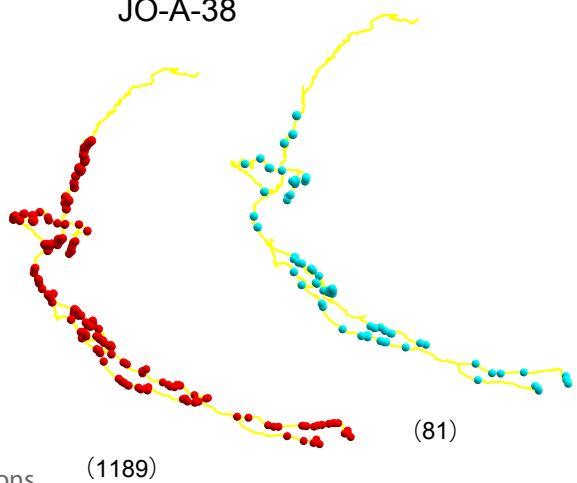

JO-A-39

JO-A-40

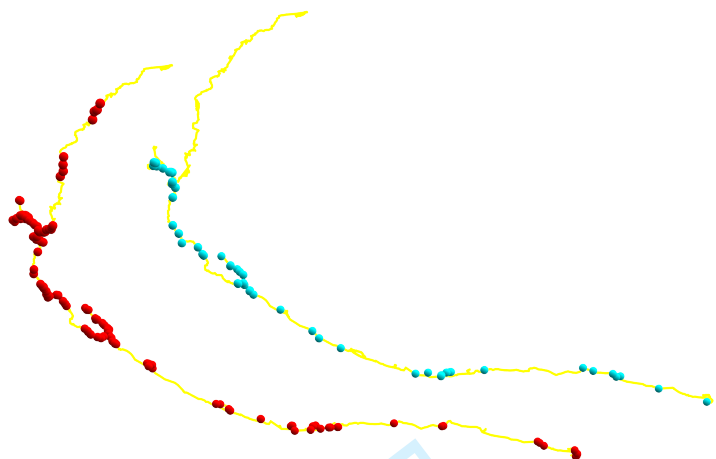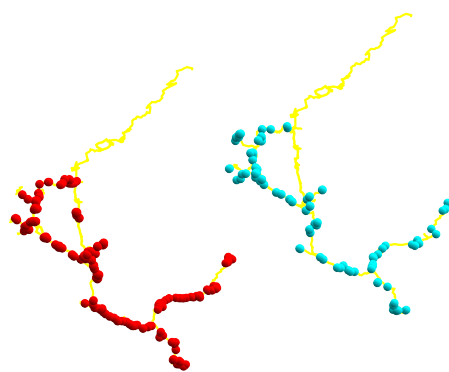

(737)

(51)

(1308)

(111)

JO-A-41

JO-A-42

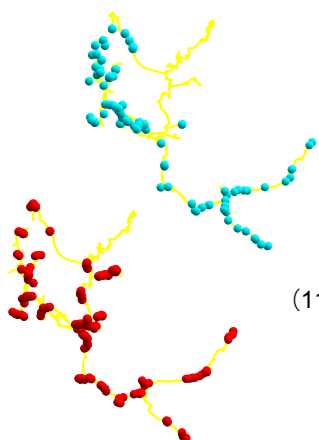

(112)

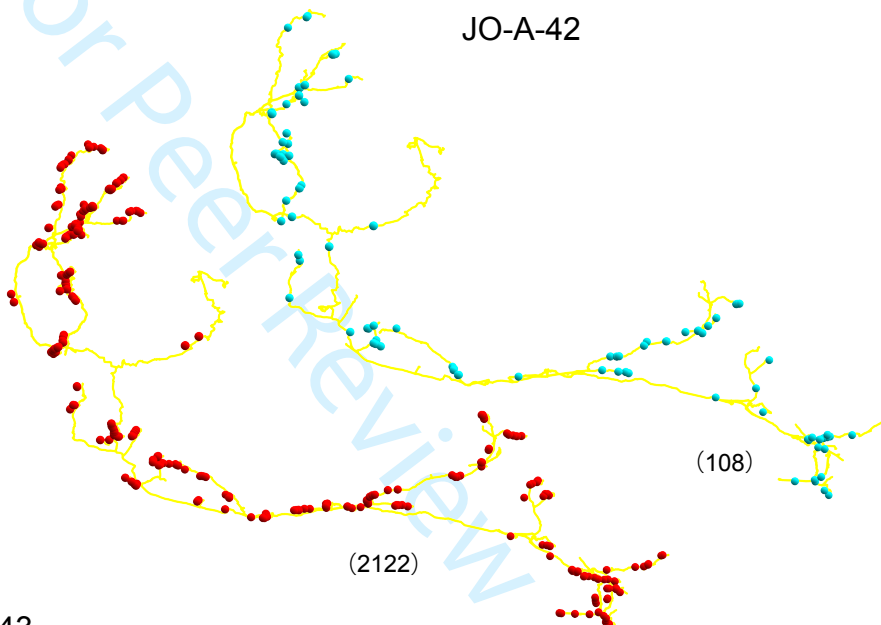

(108)

(1074)

(2122)

JO-A-43

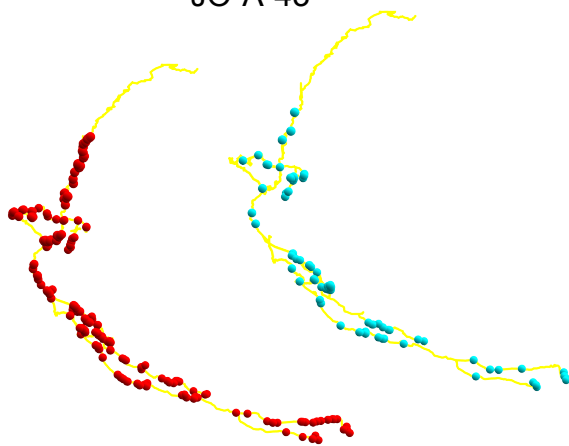

(1404)

(126)

**Pre- Post-  
synapses**

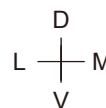

**Type-2 JO-A (Frontal)**

**d** JO-A-15

JO-A-16

JO-A-17

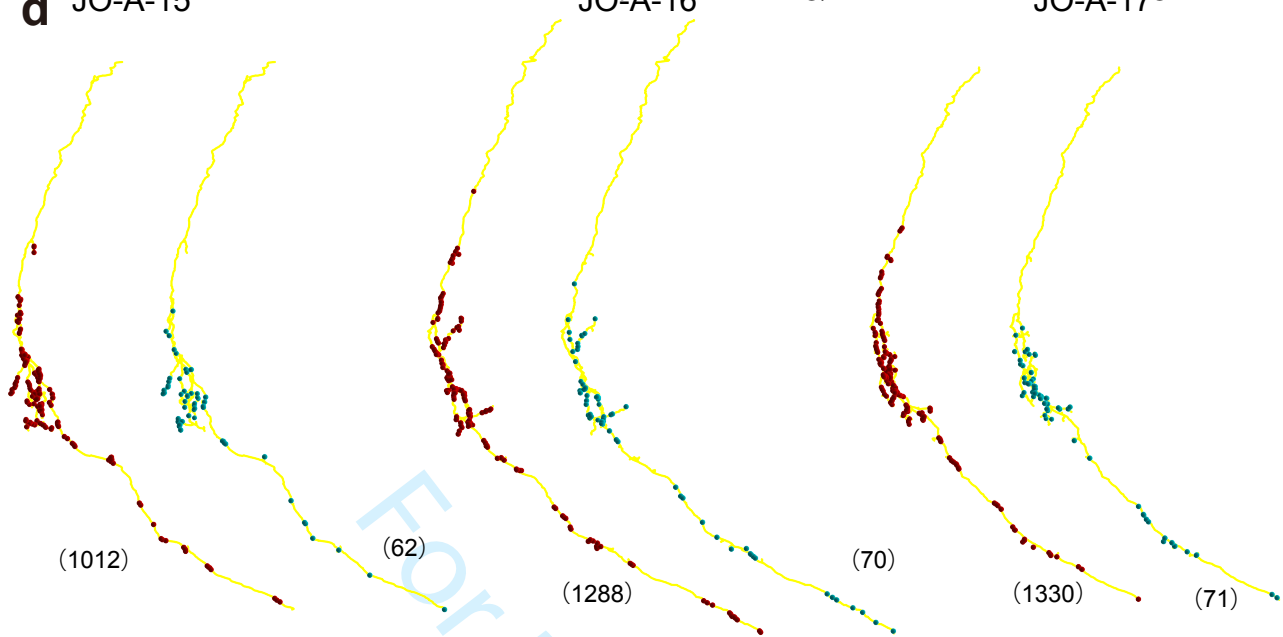

JO-A-18

JO-A-19

JO-A-20

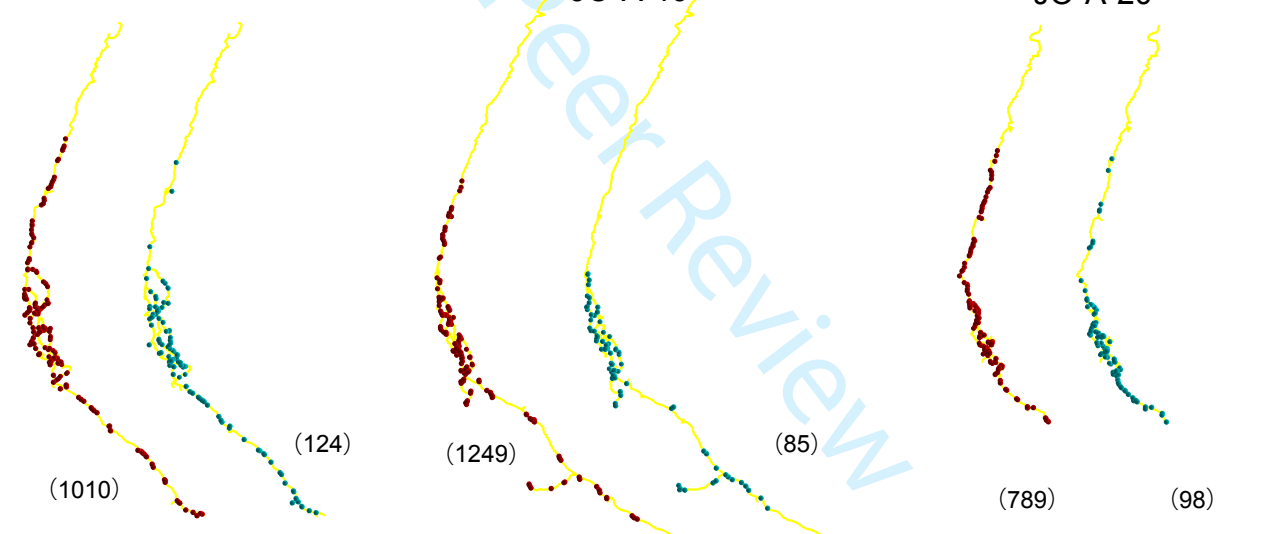

JO-A-21

JO-A-22

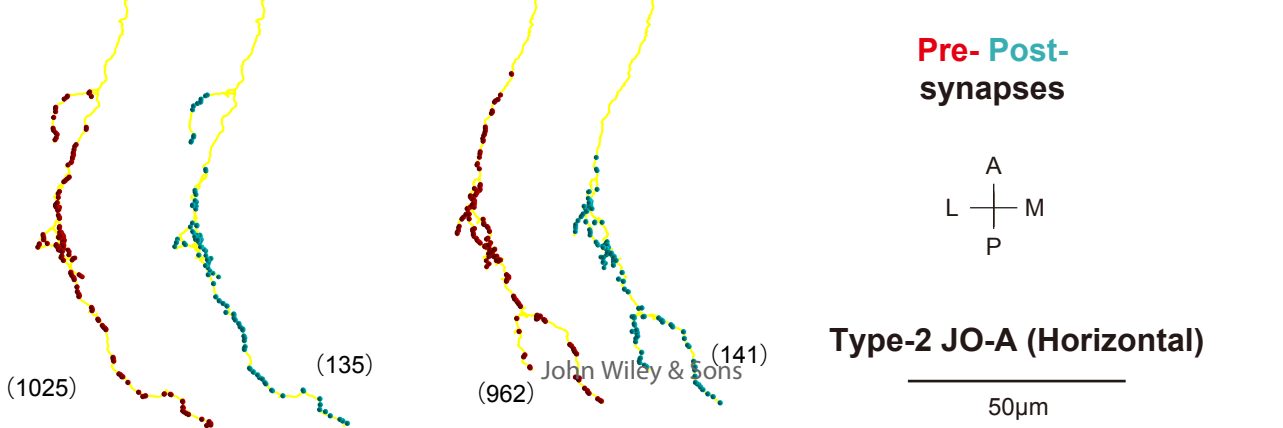

**Type-2 JO-A (Horizontal)**

50µm

JO-A-23

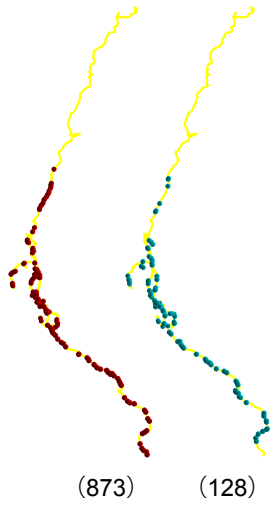

(873) (128)

JO-A-24

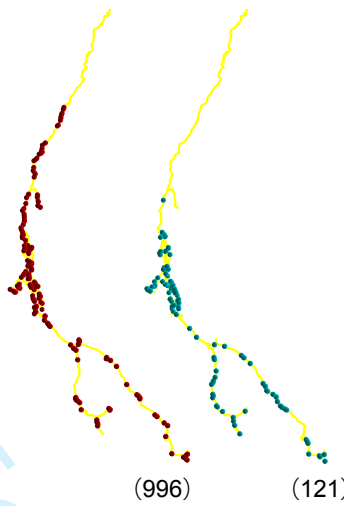

(996) (121)

JO-A-25

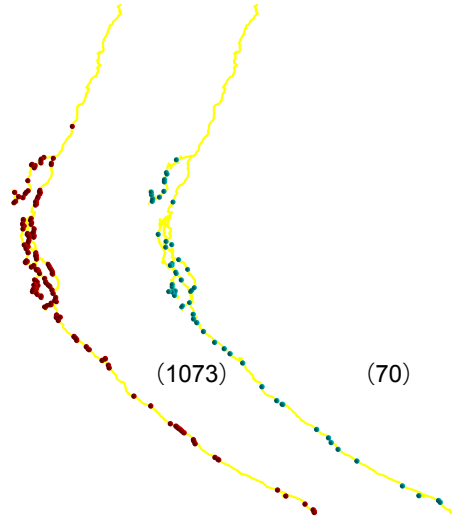

(1073) (70)

JO-A-26

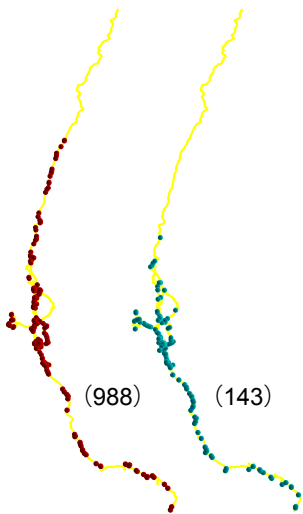

(988) (143)

JO-A-27

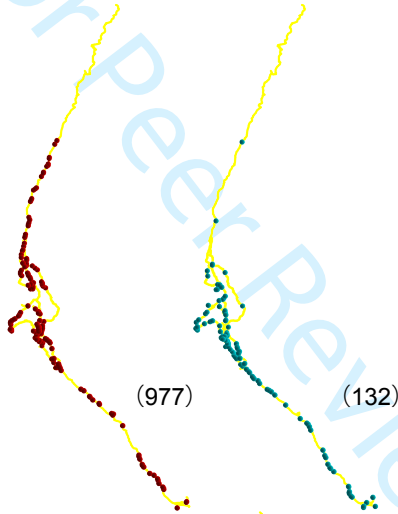

(977) (132)

JO-A-28

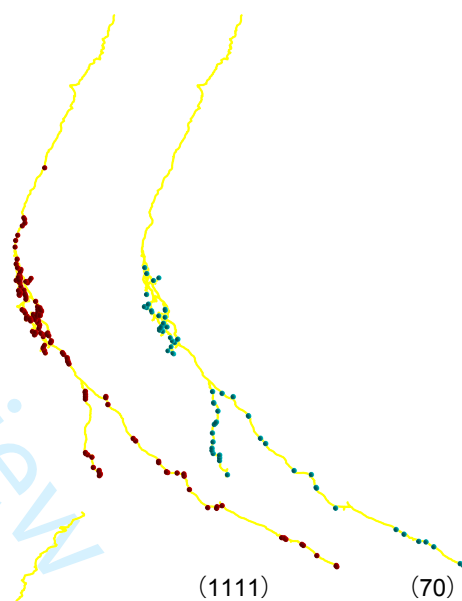

(1111) (70)

JO-A-29

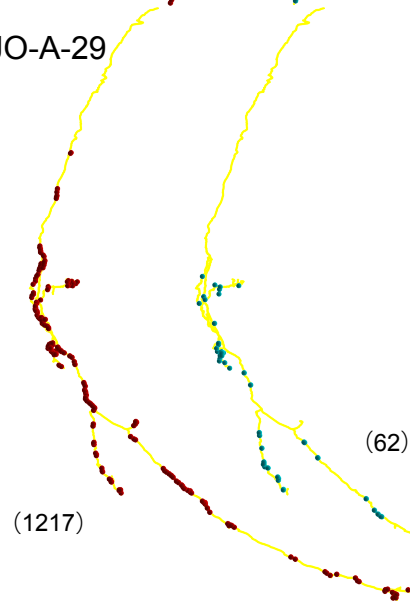

(1217)

JO-A-30

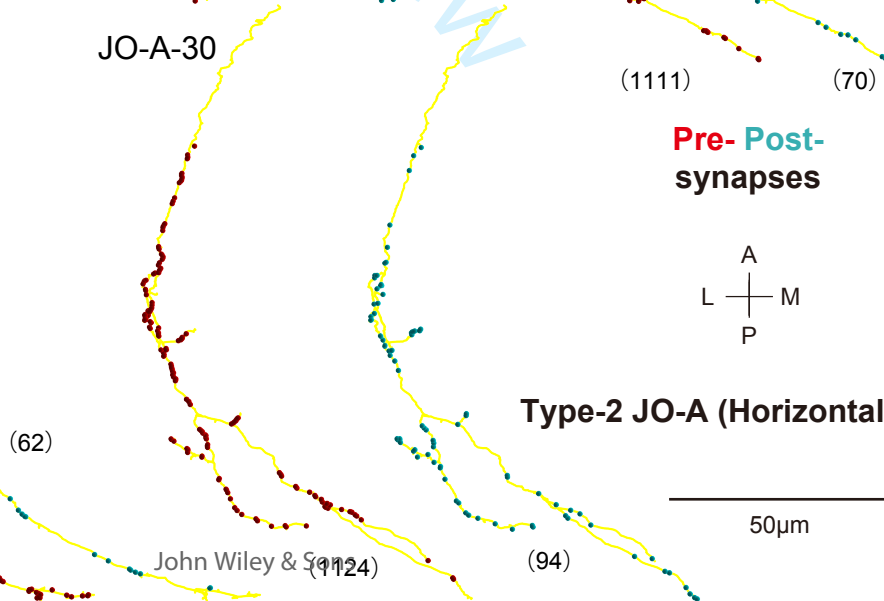

(62)

John Wiley & Sons (1124)

Type-2 JO-A (Horizontal)

Pre- Post-  
synapses

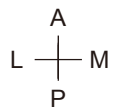

50µm

JO-A-31

JO-A-33

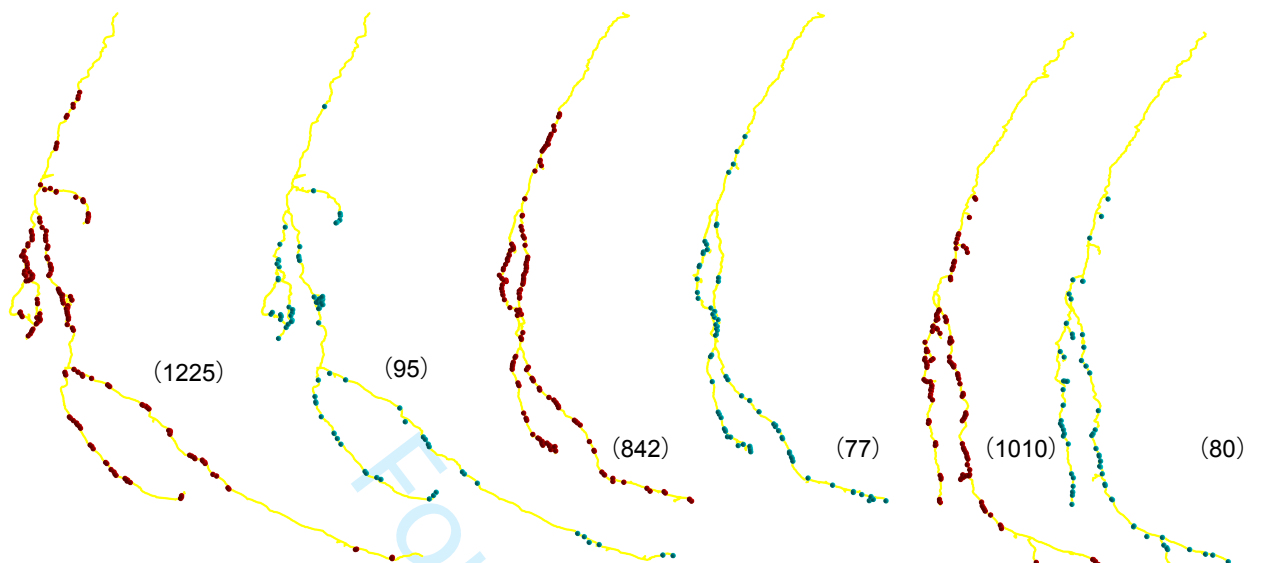

JO-A-34

JO-A-35

JO-A-36

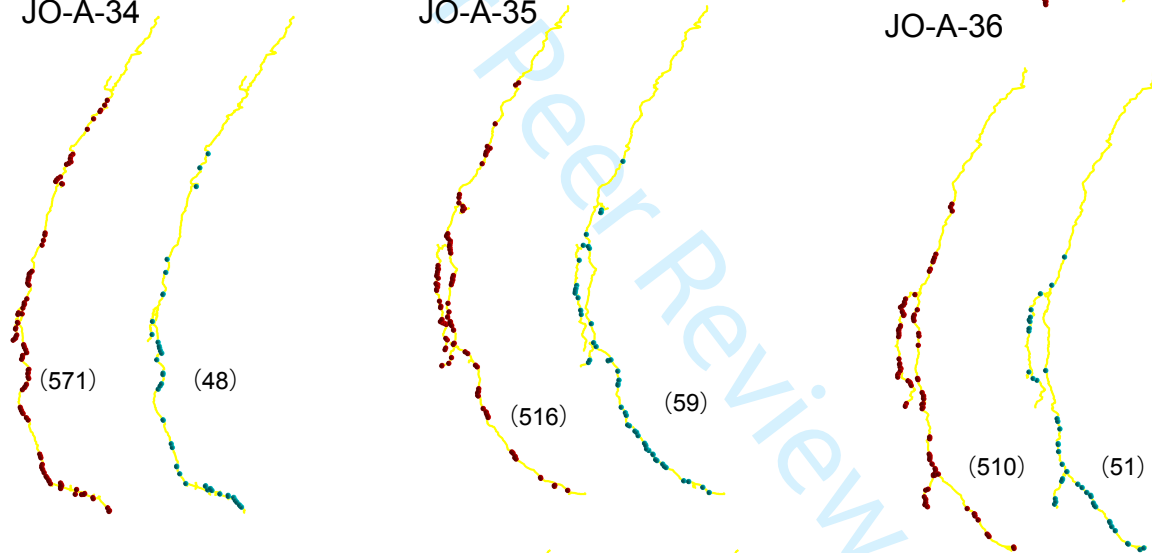

JO-A-37

JO-A-38

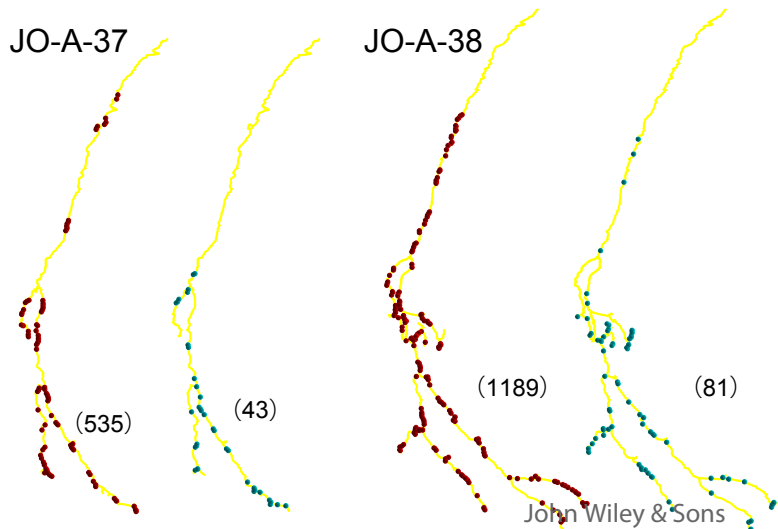

**Pre- Post-  
synapses**

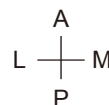

**Type-2 JO-A (Horizontal)**

50µm



JO-A-39

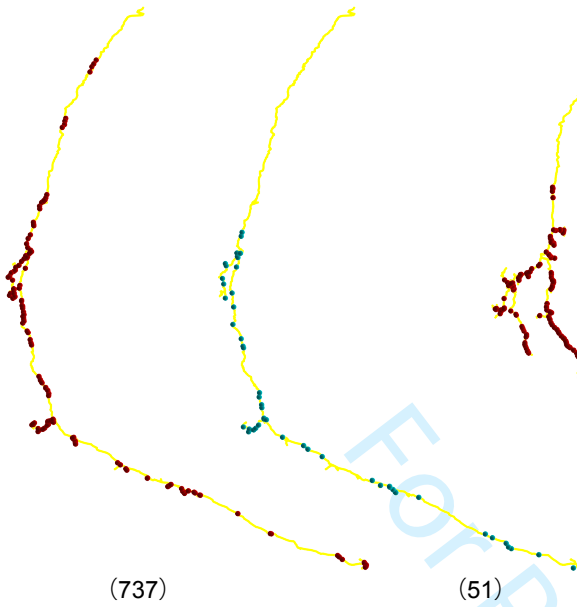

JO-A-40

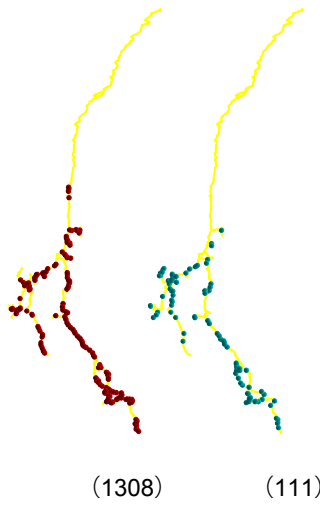

JO-A-41

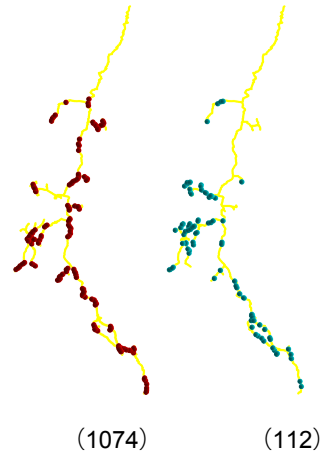

JO-A-42

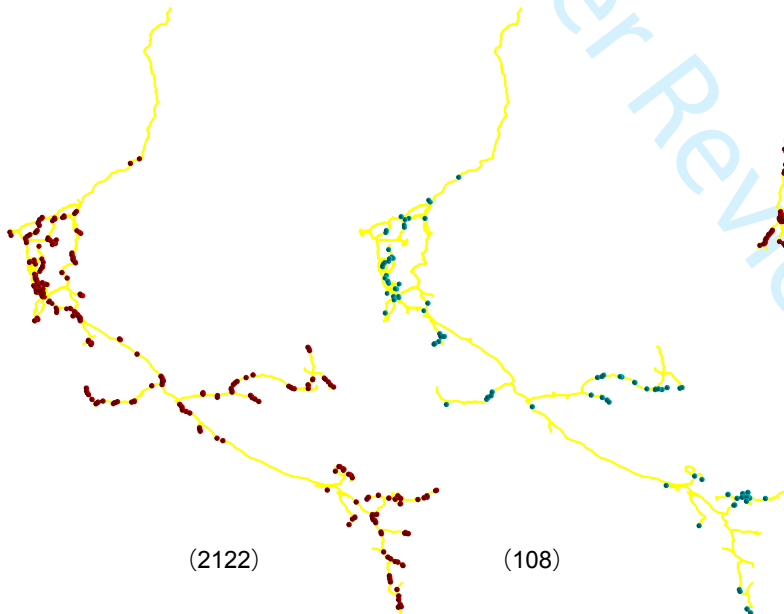

JO-A-43

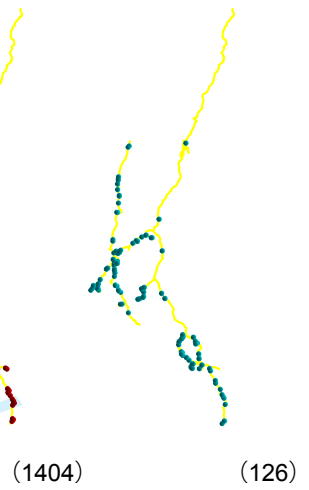

**Pre- Post-**  
**synapses**

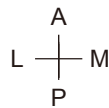

**Type-2 JO-A (Horizontal)**

e

JO-A-44

JO-A-45

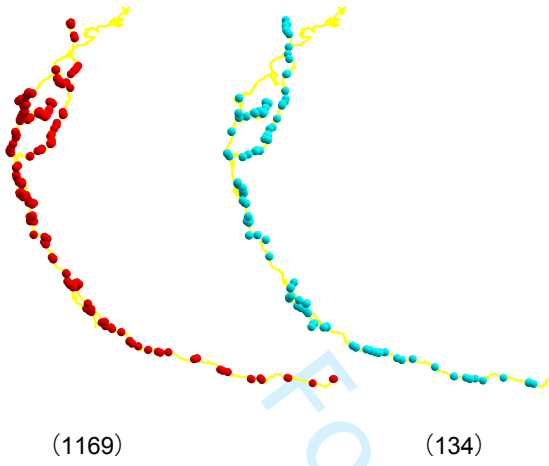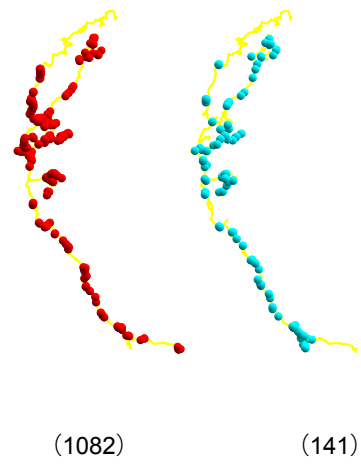

**Pre- Post-**  
**synapses**

25 $\mu$ m

D  
L — M  
V

**Type-1 JO-A (Frontal)**

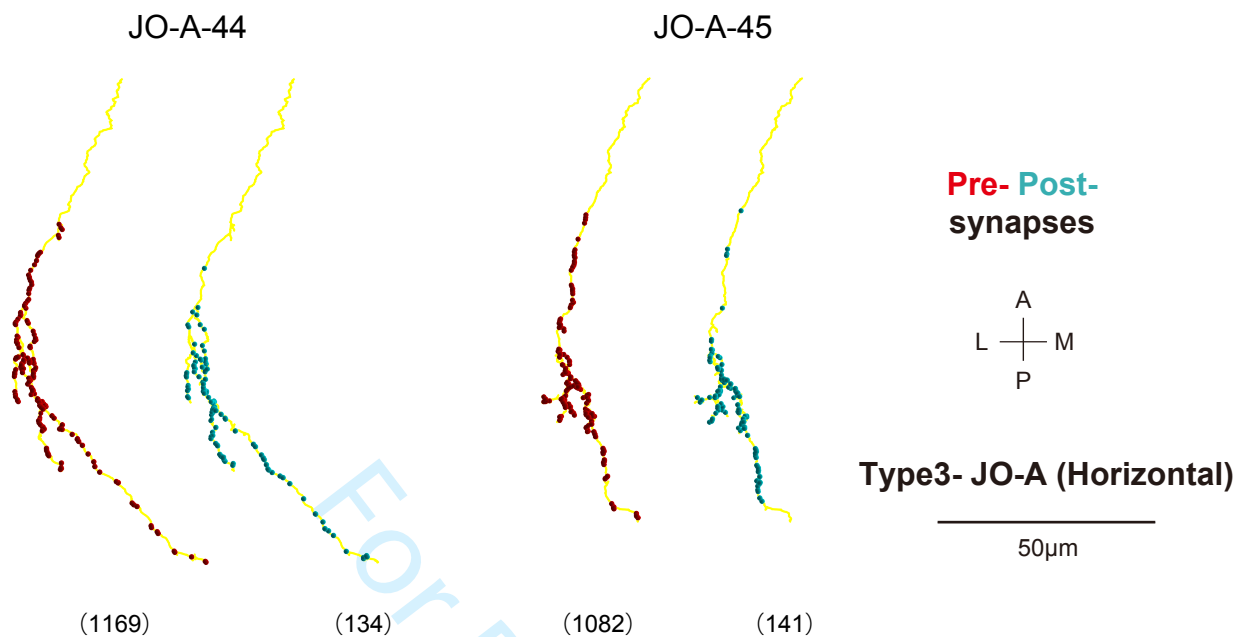

Supplementary Figure 1 | Synapse distributions along the axons of single JO-A neurons

Presynaptic (red) and postsynaptic sites (light blue) along the axon of type- 1 (a, b), 2 (c, d), and 3 (e, f) JO-A neurons (yellow). Frontal and horizontal views are shown. The upper side of the axons in the horizontal section represents the proximal side of JO neuron axons. The number in the parenthesis indicate the number of synapses in each axon. A, anterior; D, dorsal; L, lateral; M, medial; P, posterior; V, ventral.

## Figure S1

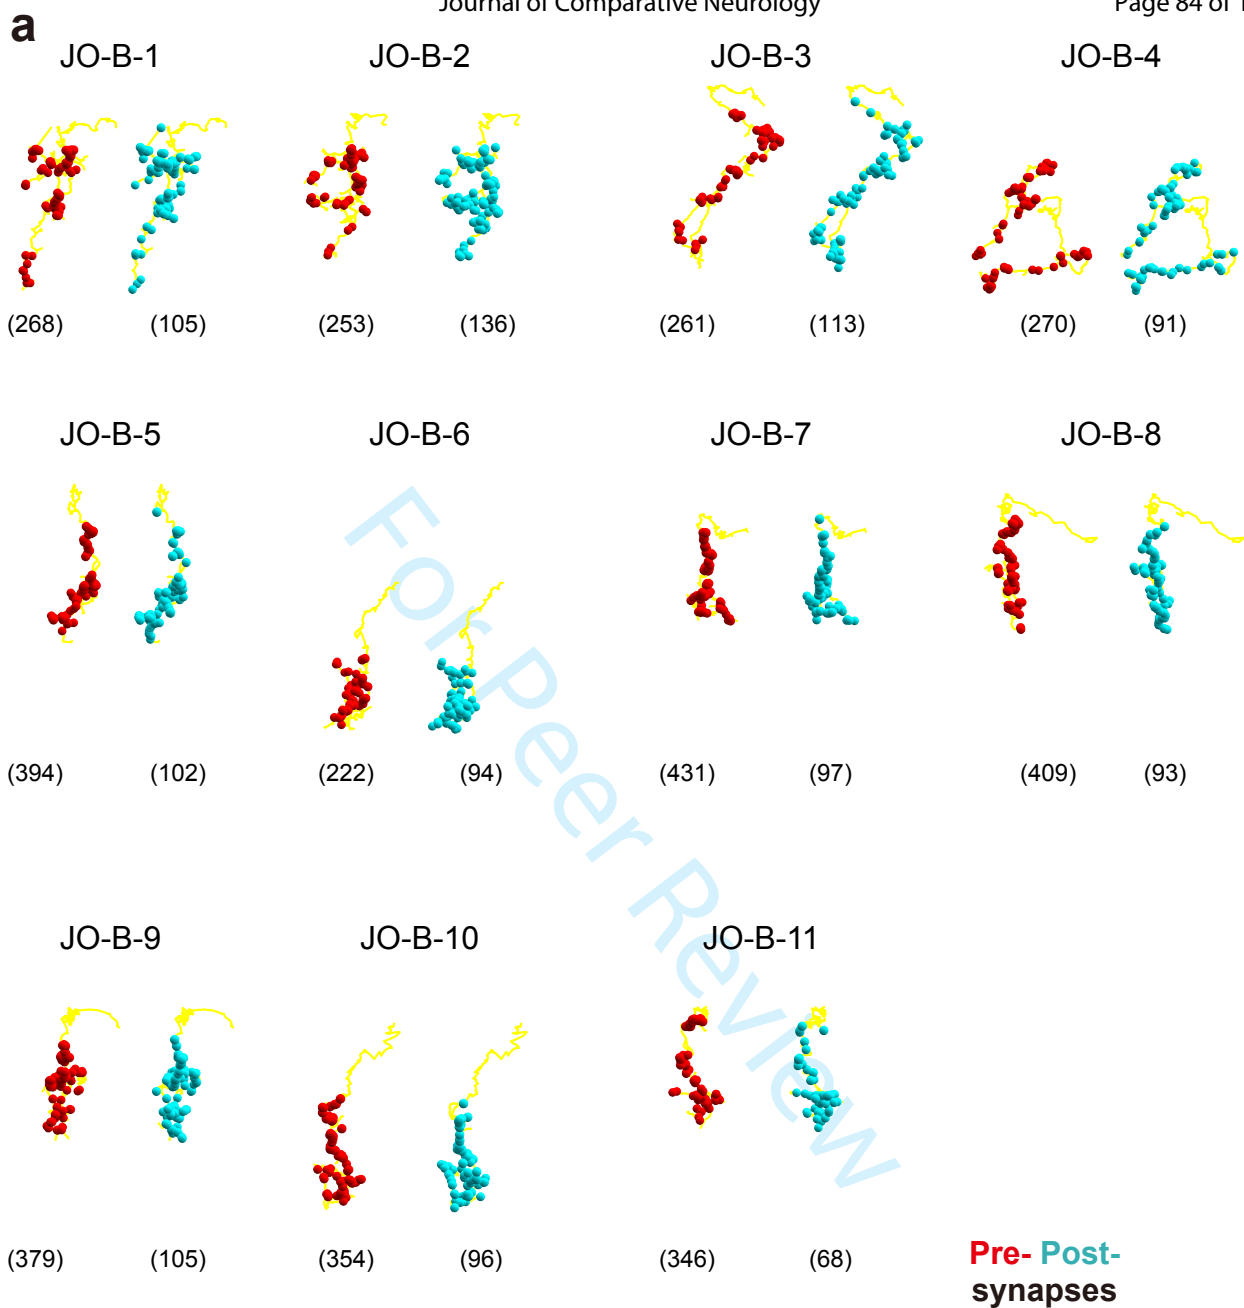

**b**

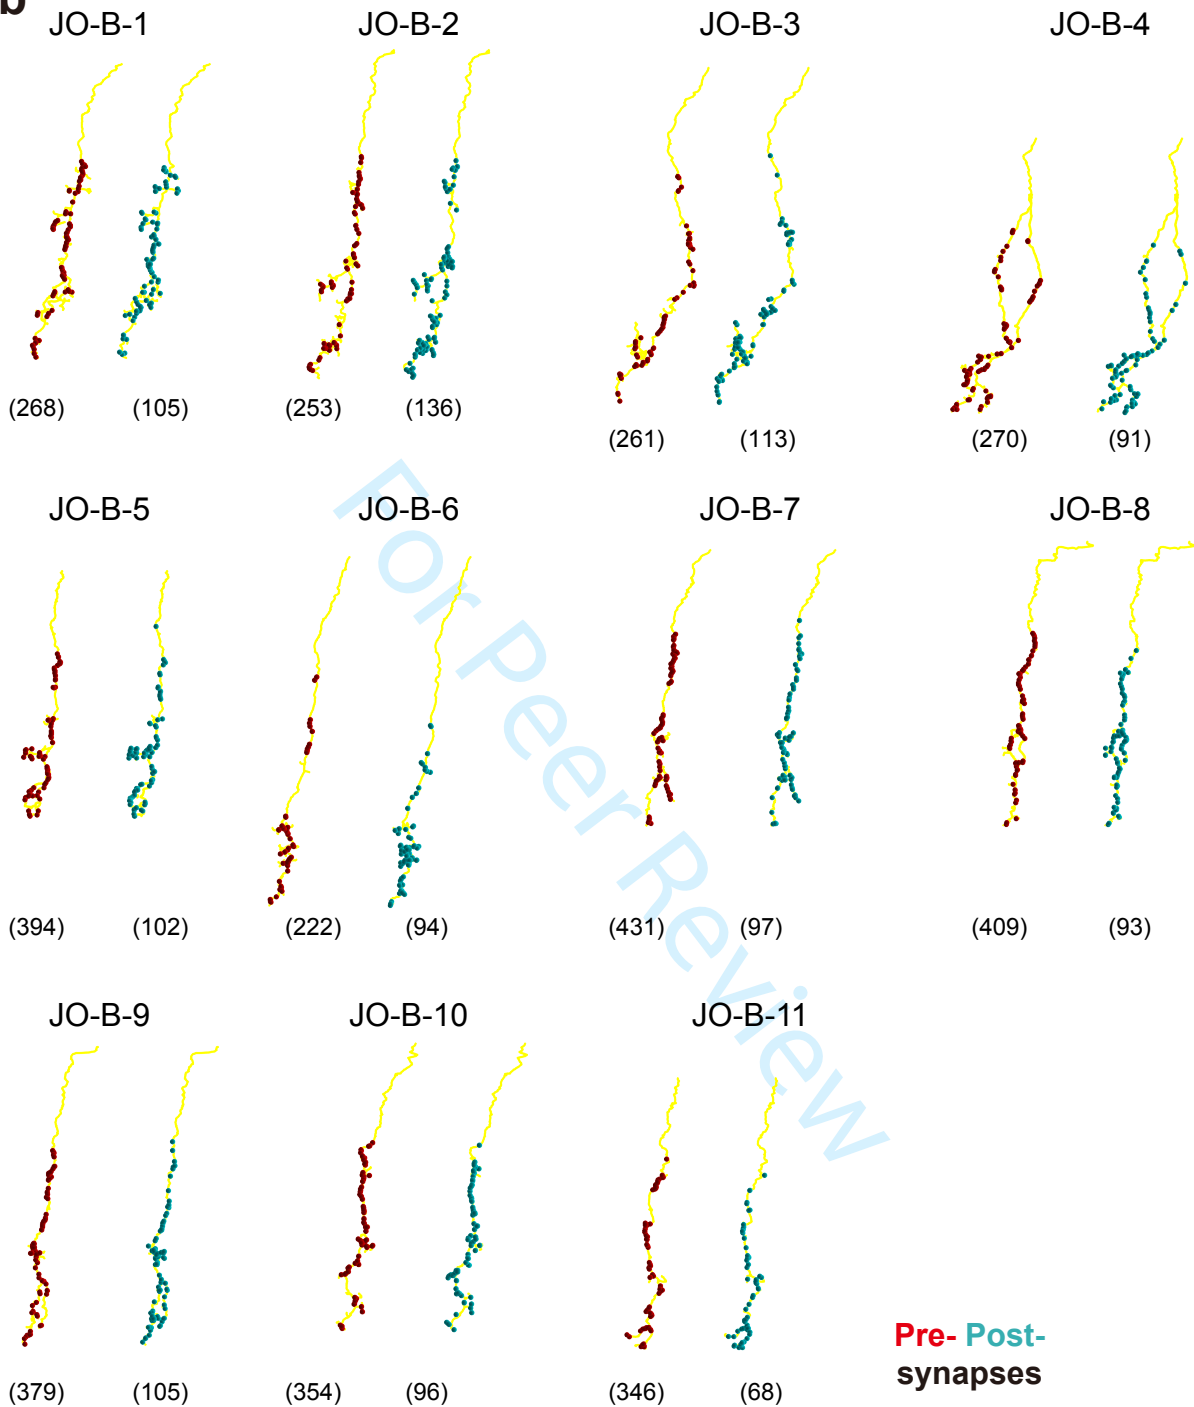

**C**

JO-B-12

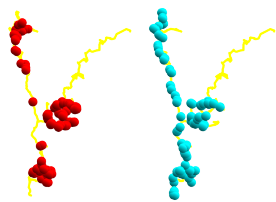

(482) (108)

JO-B-13

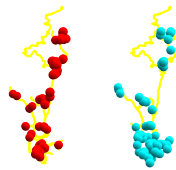

(308) (84)

JO-B-14

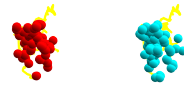

(266) (86)

JO-B-15

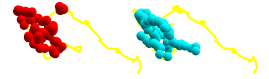

(299) (102)

JO-B-16

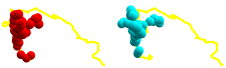

(319) (81)

JO-B-17

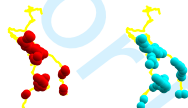

(331) (83)

JO-B-18

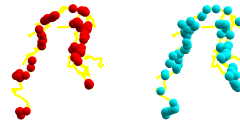

(234) (103)

JO-B-19

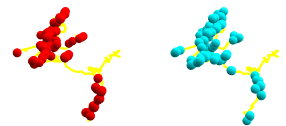

(346) (115)

JO-B-20

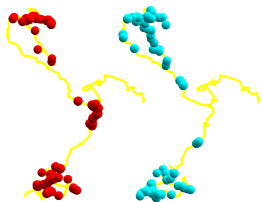

(299) (99)

JO-B-21

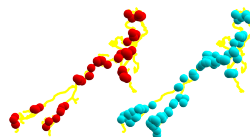

(251) (115)

JO-B-22

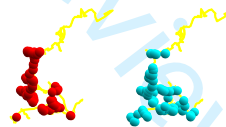

(338) (95)

JO-B-23

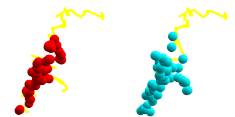

(356) (96)

JO-B-24

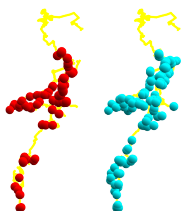

(330) (137)

Pre- Post-  
synapses

Type-2 JO-B (Frontal)

25µm

**d**

JO-B-12

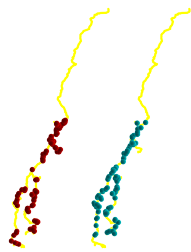

(482) (108)

JO-B-13

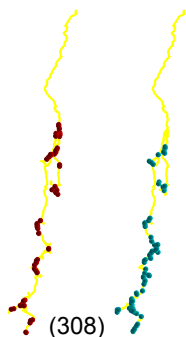

(308) (84)

JO-B-14

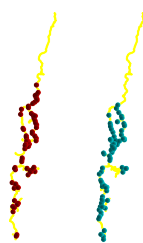

(266) (86)

JO-B-15

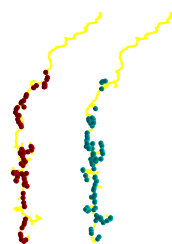

(299) (102)

JO-B-16

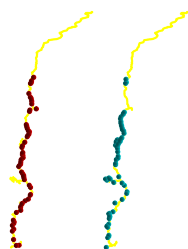

(319) (81)

JO-B-17

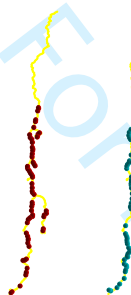

(331) (83)

JO-B-18

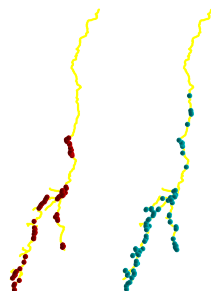

(234) (103)

JO-B-19

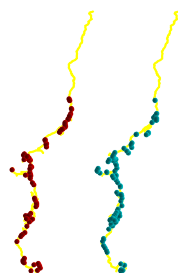

(346) (115)

JO-B-20

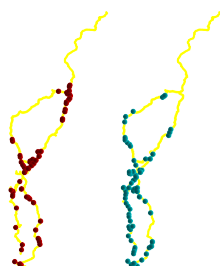

(299) (99)

JO-B-21

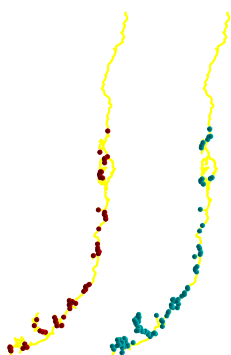

(251) (115)

JO-B-22

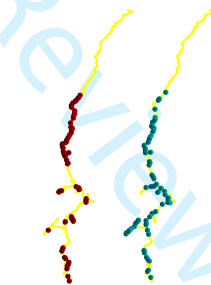

(338) (95)

JO-B-23

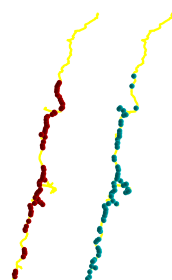

(356) (96)

JO-B-24

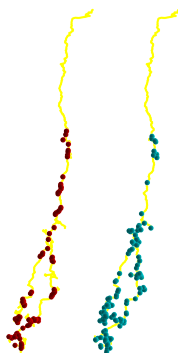

(330) (137)

**Pre- Post-  
synapses**

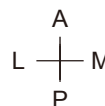

**Type-2 JO-B (Horizontal)**

50µm

**e** JO-B-25

JO-B-26

JO-B-27

JO-B-28

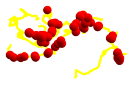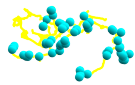

(249)

(65)

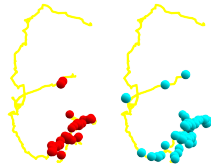

(203)

(85)

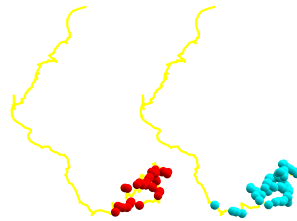

(207)

(85)

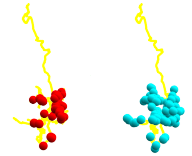

(217)

(73)

JO-B-29

JO-B-30

JO-B-31

JO-B-32

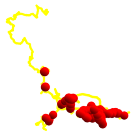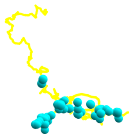

(343)

(64)

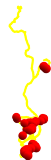

(180)

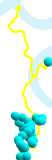

(52)

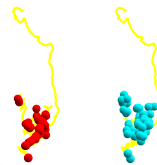

(259)



(53)

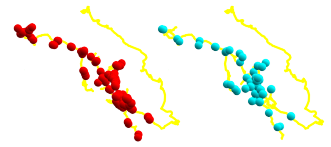

(619)

(48)

**Pre- Post-**  
**synapses**

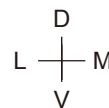

**Type-3 JO-B (Frontal)**

25µm



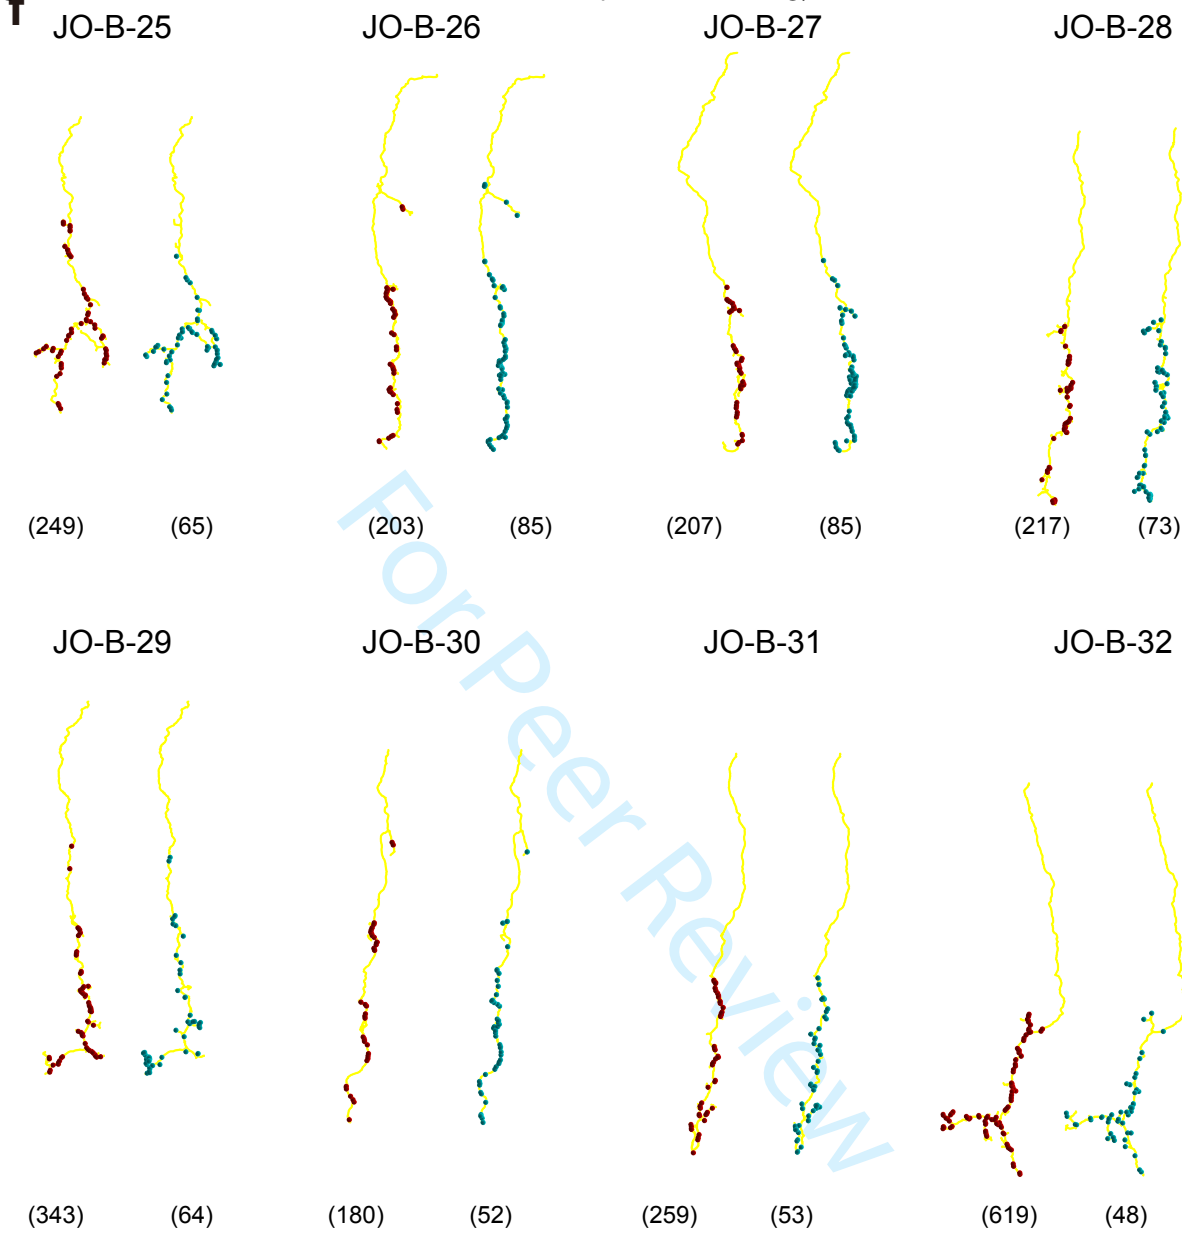

**Pre- Post-**  
**synapses**

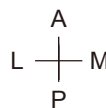

**Type-3 JO-B (Horizontal)**

**g** JO-B-33

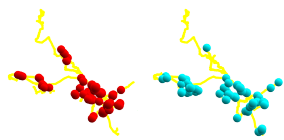

(428) (65)

JO-B-34

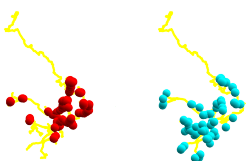

(525) (79)

JO-B-35

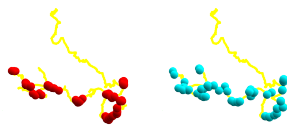

(342) (56)

JO-B-36

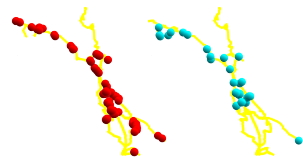

(379) (29)

JO-B-37

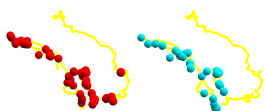

(330) (36)

JO-B-38

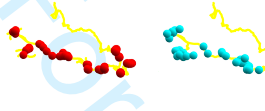

(382) (44)

JO-B-39

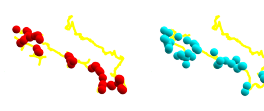

(316) (38)

JO-B-40

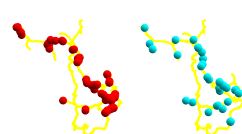

(354) (35)

JO-B-41

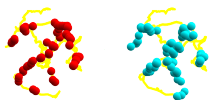

(437) (86)

JO-B-42

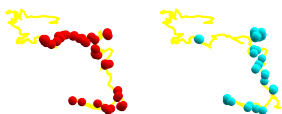

(234) (37)

JO-B-43

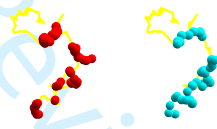

(316) (55)

JO-B-44

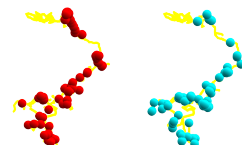

(314) (69)

JO-B-45

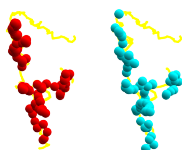

(428) (104)

**Pre- Post-**  
**synapses**

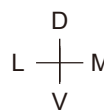

**Type-4 JO-B (Frontal)**

25µm

h

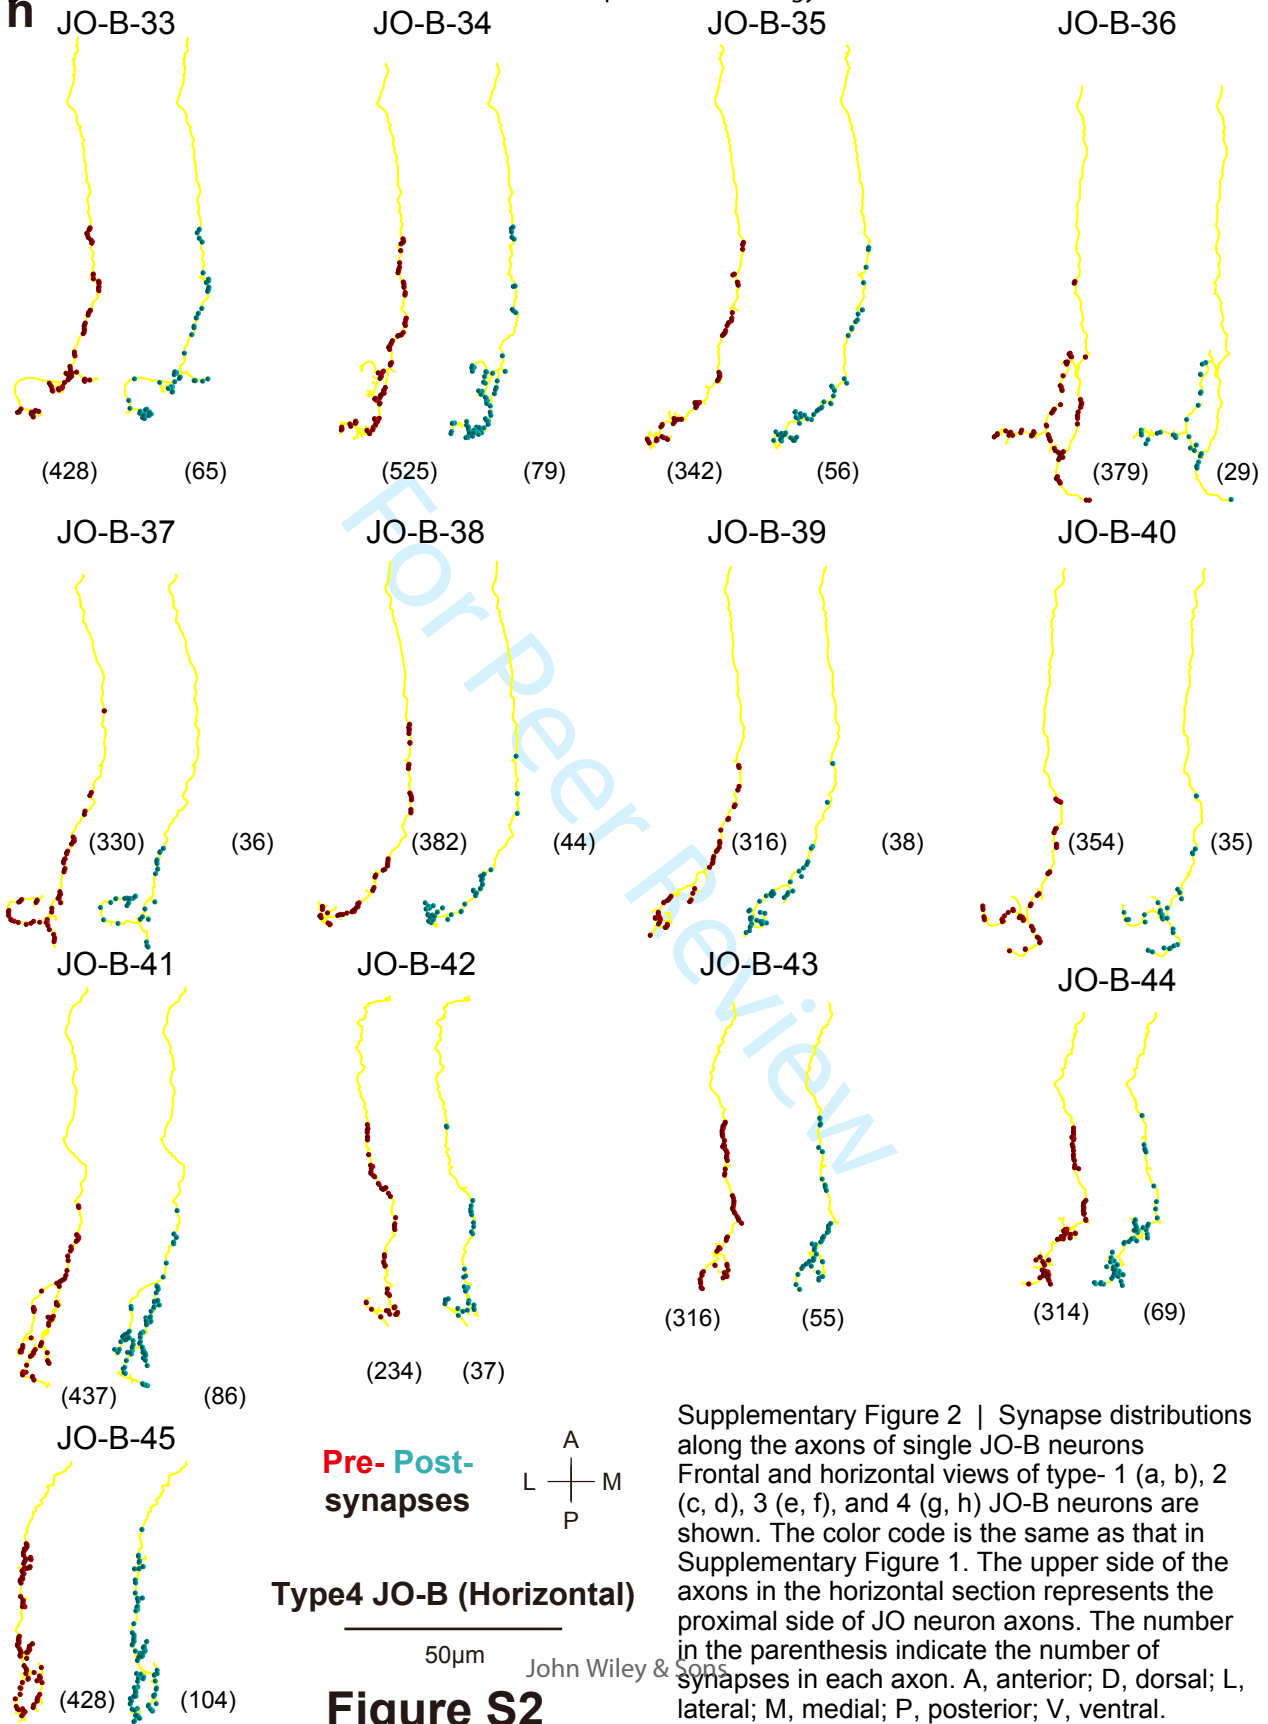

Supplementary Figure 2 | Synapse distributions along the axons of single JO-B neurons. Frontal and horizontal views of type- 1 (a, b), 2 (c, d), 3 (e, f), and 4 (g, h) JO-B neurons are shown. The color code is the same as that in Supplementary Figure 1. The upper side of the axons in the horizontal section represents the proximal side of JO neuron axons. The number in the parenthesis indicate the number of synapses in each axon. A, anterior; D, dorsal; L, lateral; M, medial; P, posterior; V, ventral.

Figure S2

**Supplementary Table 1:** Statistical comparisons between JO-A and JO-B neurons for the axon length

| Graph type        | Neuron       |       | W    | p-value      | Statistical method                              |
|-------------------|--------------|-------|------|--------------|-------------------------------------------------|
| Normality         | JO-A         |       | 0.87 | 1.671e-04*** | Shapiro-Wilk normality test                     |
|                   | JO-B         |       | 0.97 | 0.24         |                                                 |
| Graph type        | Neuron       |       |      | p-value      | Statistical method                              |
| Homoscedasticity  | JO-A vs JO-B |       |      | 9.62e-07***  | Modified robust Brown-Forsythe Levene-type test |
| Graph type        | Neuron       | Df    |      | p-value      | Statistical method                              |
| Median Comparison | JO-A vs JO-B | 52.12 |      | 4.15e-07***  | Brunner-Munzel Test                             |

Modified robust Brown-Forsythe Levene-type test is based on the absolute deviations from the median. Axons are significantly longer in JO-A than in JO-B. Asterisks indicate statistical significance: \*\*\*p<0.001

**Supplementary Table 2:** Statistical comparisons between JO-A and JO-B neurons for the number of presynaptic sites

| Graph type        | Neuron       |       | p-value     | Statistical method                              |
|-------------------|--------------|-------|-------------|-------------------------------------------------|
| Normality         | JO-A         |       | 9.88e-04*** | Shapiro-Wilk normality test                     |
|                   | JO-B         |       | 5.34e-02    |                                                 |
| Graph type        | Neuron       |       | p-value     | Statistical method                              |
| Homoscedasticity  | JO-A vs JO-B |       | 1.96e-09*** | Modified robust Brown-Forsythe Levene-type test |
| Graph type        | Neuron       | Df    | p-value     | Statistical method                              |
| Median Comparison | JO-A vs JO-B | 56.09 | <2.2e-16*** | Shapiro Brunner-Munzel Test                     |

Modified robust Brown-Forsythe Levene-type test is based on the absolute deviations from the median. JO-A neuron axons have more presynaptic sites than JO-B neuron axons. Asterisks indicate statistical significance: \*\*\*p<0.001

**Supplementary Table 3:** Statistical comparisons between JO-A and JO-B neurons for presynaptic sites /  $\mu\text{m}$ 

| Graph type        | Neuron       | W      | p-value      | Statistical method                              |
|-------------------|--------------|--------|--------------|-------------------------------------------------|
| Normality         | JO-A         | 0.97   | 0.41         | Shapiro-Wilk normality test                     |
|                   | JO-B         | 0.94   | 2.70e-02*    |                                                 |
| Graph type        | Neuron       |        | p-value      | Statistical method                              |
| Homoscedasticity  | JO-A vs JO-B |        | 0.33         | Modified robust Brown-Forsythe Levene-type test |
| Graph type        | Neuron       | W      | p-value      | Statistical method                              |
| Median Comparison | JO-A vs JO-B | 1928.5 | < 2.2e-16*** | Exact Wilcoxon rank sum test                    |

Modified robust Brown-Forsythe Levene-type test is based on the absolute deviations from the median. The number of presynaptic sites/ $\mu\text{m}$  is significantly larger in JO-A than in JO-B. Asterisks indicate statistical significance: \*\*\*p<0.001, p\*<0.05

**Supplementary Table 4:** Correlations between presynaptic and postsynaptic sites in JO-A and JO-B neurons

| Graph type                       | Neuron     |         |       |    | p-value     | Statistical method                    |
|----------------------------------|------------|---------|-------|----|-------------|---------------------------------------|
| Normality                        | JO-A, pre  |         |       |    | 9.88e-04*** | Shapiro-Wilk normality test           |
|                                  | JO-A, post |         |       |    | 0.21        |                                       |
|                                  | JO-B, pre  |         |       |    | 0.05        |                                       |
|                                  | JO-B, post |         |       |    | 0.22        |                                       |
| Graph type                       | Neuron     | r or rs | t     | df | p-value     | Statistical method                    |
| Correlation between pre and post | JO-A       | 0.20    |       |    | 0.19        | Spearman's rank correlation           |
|                                  | JO-B       | -0.07   | -0.49 | 43 | 0.63        | Pearsons's product-moment correlation |

r and rs represent the correlation coefficient in the Spearman's rank correlation test and the Pearson's product-moment correlation test, respectively. Pre, presynapses; post, postsynapses.

Asterisks indicate statistical significance: \*\*\*p<0.001

**Supplementary Table 5:** Statistical comparisons between JO-A and JO-B neurons for the number of postsynaptic sites

| Table 1           | Graph type   | Neuron   |            |      | W       | p-value            | Statistical method |
|-------------------|--------------|----------|------------|------|---------|--------------------|--------------------|
|                   | Normality    |          | JO-A       |      |         | 0.97               | 0.21               |
| JO-B              |              |          |            |      | 0.97    | 0.22               |                    |
| Graph type        | Neuron       | Df       |            | F    | p-value | Statistical method |                    |
| Homo scedasticity | JO-A vs JO-B | 44 (num) | 44 (denom) | 1.03 | 0.93    | F test             |                    |
| Graph type        | Neuron       | Df       |            | T    | p-value | Statistical method |                    |
| Mean Comparison   | JO-A vs JO-B | 88       |            | 2.09 | 0.04*   | Two Sample t-test  |                    |

JO-A neuron axons have more postsynaptic sites than JO-B neuron axons.

Asterisks indicate statistical significance: p\* < 0.05

**Supplementary Table 6:** Statistical comparisons between JO-A and JO-B neurons for postsynaptic sites / $\mu\text{m}$ 

| Graph type        | Neuron       | W     | p-value    | Statistical method                              |
|-------------------|--------------|-------|------------|-------------------------------------------------|
| Normality         | JO-A         | 0.93  | 1.10e-02*  | Shapiro-Wilk normality test                     |
|                   | JO-B         | 0.97  | 0.34       |                                                 |
| Graph type        | Neuron       |       |            | Statistical method                              |
| Homo scedasticity | JO-A vs JO-B | 0.57  |            | Modified robust Brown-Forsythe Levene-type test |
| Graph type        | Neuron       | W     | p-value    | Statistical method                              |
| Median Comparison | JO-A vs JO-B | 669.5 | 5.28e-03** | Exact Wilcoxon rank sum test                    |

Modified robust Brown-Forsythe Levene-type test is based on the absolute deviations from the median.

The number of postsynaptic sites/ $\mu\text{m}$  is significantly larger in JO-B than in JO-A.

Asterisks indicate statistical significance: \*\*p<0.01, p\* < 0.05

**Supplementary Table 7:** Statistical comparisons of the depth of postsynaptic sites within different types of JO-A neurons

| Fig. 7 | Graph type        | Neuron       |        | W    | p-value      | Statistical method                              |
|--------|-------------------|--------------|--------|------|--------------|-------------------------------------------------|
|        | Normality         | Type 1       |        | 0.99 | 7.17e-06***  | Shapiro-Wilk normality test                     |
|        |                   | Type 2       |        | 0.99 | 6.03e-10***  |                                                 |
|        |                   | Type 3       |        | 0.97 | 2.16e-05***  |                                                 |
|        | Graph type        | Neuron       |        |      | p-value      | Statistical method                              |
|        | Homo scedasticity | Within types |        |      | < 2.2e-16*** | Modified robust Brown-Forsythe Levene-type test |
|        | Graph type        | Neuron       | Df     |      | F value      | Statistical method                              |
|        | Median Comparison | Type 1 vs 2  | 3899.2 |      | < 2.2e-16*** | Brunner-Munzel Test                             |
|        |                   | Type 1 vs 3  | 296.32 |      | < 2.2e-16*** |                                                 |
|        |                   | Type 2 vs 3  | 451.92 |      | 0.85         |                                                 |

The depths of postsynaptic sites are  $81.34 \pm 12.95$  in type 1,  $118.02 \pm 15.98$  in type 2, and  $118.10 \pm 10.33$   $\mu\text{m}$  in type 3 (mean  $\pm$  standard deviation).

Modified robust Brown-Forsythe Levene-type test is based on the absolute deviations from the median. Significance level was set at 0.017 after applying Bonferroni correction.

The location of postsynaptic sites is significantly deeper in type-1 and 2 JO-A than in type 3.

Asterisks indicate statistical significance: \*\*\*p<0.001

**Supplementary Table 8:** Statistical comparisons of the depth of presynaptic sites within different types of JO-A neurons

| Fig. 7 | Graph type        | Neuron       |        | D        | p-value      | Statistical method                              |
|--------|-------------------|--------------|--------|----------|--------------|-------------------------------------------------|
|        | Normality         | Type 1       |        | 5.15e-02 | < 2.2e-16*** | One-sample Kolmogorov-Smirnov test              |
|        |                   | Type 2       |        | 6.42e-02 | < 2.2e-16*** |                                                 |
|        |                   | Type 3       |        | 7.97e-02 | 7.55e-13***  |                                                 |
|        | Graph type        | Neuron       |        |          | p-value      | Statistical method                              |
|        | Homo scedasticity | Within types |        |          | < 2.2e-16*** | Modified robust Brown-Forsythe Levene-type test |
|        | Graph type        | Neuron       | Df     |          | F value      | Statistical method                              |
|        | Median Comparison | Type 1 vs 2  | 22909  |          | < 2.2e-16*** | Brunner-Munzel Test                             |
|        |                   | Type 1 vs 3  | 2782.3 |          | < 2.2e-16*** |                                                 |
|        |                   | Type 2 vs 3  | 2918.1 |          | 0.29         |                                                 |

The depths of presynaptic sites are  $81.91 \pm 14.86$  in type 1,  $113.30 \pm 18.04$  in type 2, and  $113.22 \pm 13.51$   $\mu\text{m}$  in type 3 (mean  $\pm$  standard deviation).

Modified robust Brown-Forsythe Levene-type test is based on the absolute deviations from the median. Significance level was set at 0.017 after applying Bonferroni correction.

The location of presynaptic sites is significantly deeper in type-1 and 2 JO-A than in type 3.

Asterisks indicate statistical significance: \*\*\*p<0.001

**Supplementary Table 9:** Statistical comparisons between type-1 and 2 JO-A neurons for the axon length

| Graph type        | Neuron      | W    | p-value     | Statistical method                              |
|-------------------|-------------|------|-------------|-------------------------------------------------|
| Normality         | Type 1      | 0.90 | 0.11        | Shapiro-Wilk normality test                     |
|                   | Type 2      | 0.74 | 9.49e-06*** |                                                 |
| Graph type        | Neuron      |      | p-value     | Statistical method                              |
| Homoscedasticity  | Type 1 vs 2 |      | 6.65e-02    | Modified robust Brown-Forsythe Levene-type test |
|                   |             |      |             |                                                 |
| Graph type        | Neuron      | W    | p-value     | Statistical method                              |
| Median Comparison | Type 1 vs 2 | 0    | 2.55e-11*** | Exact Wilcoxon rank sum test                    |

Modified robust Brown-Forsythe Levene-type test is based on the absolute deviations from the median. Axon length is significantly longer in type-2 JO-A than in type 1. Because there were only two type-3 JO-A neurons, we did not include them in the statistical tests.

Asterisks indicate statistical significance: \*\*\*p<0.001

**Supplementary Table 10:** Statistical comparisons between type-1 and 2 JO-A neurons for the depth of axonal projections

| Graph type       | Neuron      | W                      | p-value | Statistical method          |                    |
|------------------|-------------|------------------------|---------|-----------------------------|--------------------|
| Normality        | Type 1      | 0.93                   | 0.29    | Shapiro-Wilk normality test |                    |
|                  | Type 2      | 0.95                   | 0.24    |                             |                    |
| Graph type       | Neuron      | Df                     | F       | p-value                     | Statistical method |
| Homoscedasticity | Type 1 vs 2 | 13 (num)<br>28 (denom) | 0.45    | 0.13                        | F test             |
|                  |             |                        |         |                             |                    |
| Graph type       | Neuron      | Df                     | T       | p-value                     | Statistical method |
| Mean Comparison  | Type 1 vs 2 | 41                     | -15.36  | <2.2e-16***                 | Two Sample t-test  |

Projection depth is significantly deeper in type-2 JO-A than type 1. Because there were only two type-3 JO-A neurons, we did not include them in the statistical tests.

Asterisks indicate statistical significance: \*\*\*p<0.001

**Supplementary Table 11:** Correlations between the number of pre and post - synaptic sites and axon length within JO-A neurons

| Graph type  | Neuron                  |      | p-value     | Statistical method          |
|-------------|-------------------------|------|-------------|-----------------------------|
| Normality   | Presynapse of JO-A      |      | 9.88e-04*** | Shapiro-Wilk normality test |
|             | Postsynapse of JO-A     |      | 0.21        |                             |
|             | Axon length of JO-A     |      | 1.67e-04*** |                             |
| Graph type  | Neuron                  | rs   | p-value     | Statistical method          |
| Correlation | Presynapses and length  | 0.86 | 2.04e-14*** | Spearman's rank correlation |
|             | Postsynapses and length | 0.02 | 0.90        |                             |

Asterisks indicate statistical significance: \*\*\*p<0.001

**Supplementary Table 12:** Statistical comparisons of the axon length within different types of JO-B neurons

| Graph type          | Neuron       |    | W                            |         | p-value | Statistical method          |
|---------------------|--------------|----|------------------------------|---------|---------|-----------------------------|
| Normality           | Type 1       |    | 0.89                         |         | 0.13    | Shapiro-Wilk normality test |
|                     | Type 2       |    | 0.94                         |         | 0.51    |                             |
|                     | Type 3       |    | 0.89                         |         | 0.23    |                             |
|                     | Type 4       |    | 0.97                         |         | 0.85    |                             |
| Graph type          | Neuron       | Df |                              |         | p-value | Statistical method          |
| Homoscedasticity    | Within types | 3  |                              |         | 0.79    | Bartlett test               |
| Graph type          | Neuron       | Df | Sq                           | F value | Pr (>F) | Statistical method          |
| Comparison of means | Within types | 3  | 2564 (Sum)<br>854.6 (Mean)   | 0.56    | 0.69    | One-way ANOVA               |
|                     | Residuals    | 41 | 50802 (Sum)<br>1239.1 (Mean) |         |         |                             |

No significant difference within types of JO-B neurons.

**Supplementary Table 13:** Statistical comparisons of the depth of axonal projections within different types of JO-B neurons

| Graph type        | Neuron       |       | W    | p-value      | Statistical method                              |
|-------------------|--------------|-------|------|--------------|-------------------------------------------------|
| Normality         | Type 1       |       | 0.87 | 6.72e-02     | Shapiro-Wilk normality test                     |
|                   | Type 2       |       | 0.95 | 0.59         |                                                 |
|                   | Type 3       |       | 0.94 | 0.57         |                                                 |
|                   | Type 4       |       | 0.78 | 3.80e-03**   |                                                 |
| Graph type        | Neuron       |       |      | p-value      | Statistical method                              |
| Homo scedasticity | Within types |       |      | 4.99e-2      | Modified robust Brown-Forsythe Levene-type test |
| Graph type        | Neuron       | Df    |      | F value      | Statistical method                              |
| Median Comparison | Type 1 vs 2  | 21.77 |      | 0.76         | Brunner-Munzel Test                             |
|                   | Type 1 vs 3  | 12.89 |      | 2.41e-10***  |                                                 |
|                   | Type 1 vs 4  | 15.19 |      | 5.41e-03**   |                                                 |
|                   | Type 2 vs 3  | 17.68 |      | < 2.2e-16*** |                                                 |
|                   | Type 2 vs 4  | 14.39 |      | 3.61e-03**   |                                                 |
|                   | Type 3 vs 4  | 18.63 |      | 0.72         |                                                 |

Type-1 and 2 JO-B neurons terminate more anteriorly than type- 3 and 4.

Modified robust Brown-Forsythe Levene-type test is based on the absolute deviations from the median.

Significance level was set at 0.0083 after applying Bonferroni correction.

Asterisks indicate statistical significance: \*\*\*p<0.001, \*\*p<0.01



**Supplementary Table 14:** Statistical comparisons of the number of postsynapses within different types of JO-B neurons

| Graph type          | Neuron       |        | W                          | p-value | Statistical method          |                           |
|---------------------|--------------|--------|----------------------------|---------|-----------------------------|---------------------------|
| Normality           | Type 1       |        | 0.92                       | 0.30    | Shapiro-Wilk normality test |                           |
|                     | Type 2       |        | 0.93                       | 0.31    |                             |                           |
|                     | Type 3       |        | 0.90                       | 0.32    |                             |                           |
|                     | Type 4       |        | 0.92                       | 0.25    |                             |                           |
| Graph type          | Neuron       | Df     |                            | p-value | Statistical method          |                           |
| Homoscedasticity    | Within types | 3      |                            | 0.44    | Bartlett test               |                           |
| Graph type          | Neuron       | Df     | Sq                         | F value | Pr (>F)                     | Statistical method        |
| Comparison of means | Within Type  | 3      | 18579 (Sum)<br>6193 (Mean) | 18.65   | 8.77e-08***                 | One-way ANOVA             |
|                     | Residuals    | 41     | 13618 (Sum)<br>332 (Mean)  |         |                             |                           |
| Graph type          | Neuron       | diff   | lwr                        | Upr     | P adj                       | Statistical method        |
| Multiple comparison | Type 2 vs 1  | 0.31   | -19.68                     | 20.30   | 1.00                        | Tukey multiple comparison |
|                     | Type 3 vs 1  | -34.38 | -57.05                     | 11.70   | 1.19e-03**                  |                           |
|                     | Type 4 vs 1  | -43.62 | -63.61                     | -23.62  | 4.20e-06***                 |                           |
|                     | Type 3 vs 2  | -34.68 | -56.61                     | -12.75  | 7.03e-04***                 |                           |
|                     | Type 4 vs 2  | -43.92 | -63.06                     | -24.78  | 1.60e-06***                 |                           |
|                     | Type 4 vs 3  | -9.24  | -31.17                     | 12.69   | 0.67                        |                           |

Type-1 and 2 JO-B neuron axons have more postsynaptic sites than type- 3 and 4. Asterisks indicate statistical significance: \*\*\*p<0.001, \*\*p<0.01

**Supplementary Table 15:** Statistical comparisons of the depth of postsynaptic sites within different types of JO-B neurons

| Fig. 10     | Graph type        | Neuron       |        | W            | p-value      | Statistical method                              |                             |
|-------------|-------------------|--------------|--------|--------------|--------------|-------------------------------------------------|-----------------------------|
|             | Normality         | Type 1       |        |              | 0.99         | 1.07e-08***                                     | Shapiro-Wilk normality test |
|             |                   | Type 2       |        |              | 0.98         | 1.50e-10***                                     |                             |
|             |                   | Type 3       |        |              | 0.99         | 5.25e-05***                                     |                             |
|             |                   | Type 4       |        |              | 0.90         | < 2.2e-16***                                    |                             |
|             | Graph type        | Neuron       |        |              | p-value      | Statistical method                              |                             |
|             | Homoscedasticity  | Within types |        |              | < 2.2e-16*** | Modified robust Brown-Forsythe Levene-type test |                             |
|             | Graph type        | Neuron       | Df     |              | F value      | Statistical method                              |                             |
|             | Median Comparison | Type 1 vs 2  | 2335.6 |              | 0.31         | Brunner-Munzel Test                             |                             |
|             |                   | Type 1 vs 3  | 914.17 |              | < 2.2e-16*** |                                                 |                             |
| Type 1 vs 4 |                   | 1016.4       |        | < 2.2e-16*** |              |                                                 |                             |
| Type 2 vs 3 |                   | 929.66       |        | < 2.2e-16*** |              |                                                 |                             |
| Type 2 vs 4 |                   | 996.94       |        | < 2.2e-16*** |              |                                                 |                             |
| Type 3 vs 4 |                   | 1163.3       |        | 1.29e-03**   |              |                                                 |                             |

The depths of postsynaptic sites are  $92.41 \pm 15.19$  in type 1,  $92.09 \pm 15.24$  in type 2,  $115.77 \pm 16.49$  in type 3, and  $118.41 \pm 23.02$   $\mu\text{m}$  in type 4 (mean  $\pm$  standard deviation).

The location of postsynaptic sites is significantly deeper in type- 3 and 4 JO-A than in type 1 and 2, and in type-4 JO-A than in type 3.

Modified robust Brown-Forsythe Levene-type test is based on the absolute deviations from the median.

Significance level set at 0.0083 after applying Bonferroni correction

Asterisks indicate statistical significance: \*\*\* $p < 0.001$ , \*\* $p < 0.01$

**Supplementary Table 16:** Statistical comparisons of the depth of presynaptic sites within different types of JO-B neurons

| Fig. 10     | Graph type        | Neuron       |        | W            | p-value      | Statistical method                              |                             |
|-------------|-------------------|--------------|--------|--------------|--------------|-------------------------------------------------|-----------------------------|
|             | Normality         | Type 1       |        |              | 0.97         | < 2.2e-16***                                    | Shapiro-Wilk normality test |
|             |                   | Type 2       |        |              | 0.97         | < 2.2e-16***                                    |                             |
|             |                   | Type 3       |        |              | 0.97         | < 2.2e-16***                                    |                             |
|             |                   | Type 4       |        |              | 0.92         | < 2.2e-16***                                    |                             |
|             | Graph type        | Neuron       |        |              | p-value      | Statistical method                              |                             |
|             | Homoscedasticity  | Within types |        |              | < 2.2e-16*** | Modified robust Brown-Forsythe Levene-type test |                             |
|             | Graph type        | Neuron       | Df     |              | F value      | Statistical method                              |                             |
|             | Median Comparison | Type 1 vs 2  | 7398.5 |              | 9.84e-02     | Brunner-Munzel Test                             |                             |
|             |                   | Type 1 vs 3  | 4293.3 |              | < 2.2e-16*** |                                                 |                             |
| Type 1 vs 4 |                   | 7438.1       |        | < 2.2e-16*** |              |                                                 |                             |
| Type 2 vs 3 |                   | 4335.4       |        | < 2.2e-16*** |              |                                                 |                             |
| Type 2 vs 4 |                   | 7266.4       |        | < 2.2e-16*** |              |                                                 |                             |
| Type 3 vs 4 |                   | 5921.7       |        | 6.97e-05***  |              |                                                 |                             |

The depths of presynaptic sites are  $86.89 \pm 16.03$  in type 1,  $86.25 \pm 15.64$  in type 2,  $117.93 \pm 18.51$  in type 3, and  $118.41 \pm 23.47$   $\mu\text{m}$  in type 4 (mean  $\pm$  standard deviation).

The location of presynaptic sites is significantly deeper in type- 3 and 4 JO-A than in type 1 and 2, and in type-4 JO-A than in type 3.

Modified robust Brown-Forsythe Levene-type test is based on the absolute deviations from the median.

Significance level was set at 0.0083 after applying Bonferroni correction.

Asterisks indicate statistical significance: \*\*\*p<0.001

**Supplementary Table 17:** Statistical comparisons of the numbers of AMMC-B1 neurons labelled as monosynaptic downstream of JO-A and JO-B neurons

|                 |                   |               |                      |             |                   |                             |
|-----------------|-------------------|---------------|----------------------|-------------|-------------------|-----------------------------|
| Fig. 14         | <b>Graph type</b> | <b>Neuron</b> |                      | <b>W</b>    | <b>p-value</b>    | <b>Statistical method</b>   |
|                 | Normality         | JO-A          |                      | 0.86        | 8.83e-02          | Shapiro-Wilk normality test |
|                 |                   | JO-B          |                      | 0.92        | 0.43              |                             |
|                 | <b>Graph type</b> | <b>Neuron</b> | <b>Df</b>            | <b>F</b>    | <b>p-value</b>    | <b>Statistical method</b>   |
|                 | Homoscedasticity  | JO-A vs JO-B  | 8 (num)<br>7 (denom) | 0.92        | 0.90              | F test                      |
|                 | <b>Graph type</b> | <b>Neuron</b> | <b>Df</b>            | <b>T</b>    | <b>p-value</b>    | <b>Statistical method</b>   |
| Mean Comparison | JO-A vs JO-B      | 15            | -7.56                | 1.72e-06*** | Two Sample t-test |                             |

*trans*-Tango of JO-B neurons have more labeled AMMC-B1 neurons than that of JO-A neurons.

Asterisks indicate statistical significance: \*\*\*p<0.001

For Peer Review
